# Supplementary material for: Infrasound and seismoacoustic signatures of the September 28 th 2018 Sulawesi super shear earthquake
Source: Copernicus journal article supplement (doi:10.5194/nhess-2019-179), 2019-06-11
Supplement: Supplementary file [file nhess-2019-179-AC1-supplement.pdf]

Dear Peter Näsholm,

thank you very much for taking the time and interest to deliver this very thorough and constructive review of our manuscript. We carefully studied your comments and made changes and corrections to the manuscript where necessary. We hope our changes and corrections are sufficient to make our article suitable for publication soon. Your comments and suggestions certainly helped to improve quality and clarity of the paper.

Thank you again, best regards

Christoph Pilger and co-authors

### RESPONSES to Reviewer 1 (provided below each reviewer comment in green):

Recommendations on specific aspects

1) Super-shear related analyses:

I recommend providing a more concise background on why it is interesting to understand if the observed strong infrasound waves are related to the super-shear nature of the earthquake. Then the discussion and comparison with other earthquakes can be linked to the added background information. For example, it could be explained more precisely what is a super-shear earthquake and it could be mentioned that these can be associated with an effect analogous to acoustic sonic booms with the source traveling faster than the wave propagation speed.

Since the detectability is naturally influenced by the presence of infrasound arrays within the waveguides available from the source, the authors could consider complementing Table 2 with additional information on the infrasound array network available around each of the listed events.

What are the criteria used for the assessments *weak infrasound* and *strong infrasound* in Table 2? I would also recommend stating the distance between event and station, instead of no or vague information about distance (*nearby / remote*).

It would be informative with a concise explanation why the registrations (or non-registrations) of seismic arrivals on the infrasound stations are relevant to the assessment? (Otherwise, I would recommend removing this information from Table 2)

**RESPONSE:** We added a more concise description and background information to super-shear earthquakes to the second paragraph of the introduction (including comparison to sonic booms, shear wave mach cone, increased ground motion and references).

We modified table 2 (now table 3) to not just mention selected IMS stations detecting the event, but to mention all IMS stations available (and data-providing) at the given time within a radius of 5000 km. We separate them between "event detection" and "no event detection". This should highlight how the detectability is related to the available stations, also providing their distances to the respective event epicenter.

We added the signal duration to each detection, but we removed the assessments of "weak" and "strong" infrasound in the table, since there's no objective criterion to derive that. The amplitude naturally decreases with distance, whereas amplitude and thus also signal-to-noise ratio depends on the chosen filter-bands as well.

The distances qualifications of "nearby" and "remote" were removed in favor of precise distances per station. We removed the information of seismic arrivals from the table following the reviewer's suggestion.

2) Back-projection analysis:

I would recommend reinforcing the discussion on the back-projection analysis. Based on the current displays, I find it hard to analyze what are the key wavetrain segments on the different stations that contribute to the different highlighted geographical regions shown in Fig. 5.

Maybe it would be useful to provide an additional back-projection result map per station, either in the paper body or in an appendix? This might make it more straightforward to the reader to see, e.g., if the two blue colored source regions at around 127°E are related to signals on one or on multiple stations. This could also help providing insight in the way each of the stations constrains the source region estimates on Sulawesi. As a suggestion, the coloring of the added per-station maps might be a function of the reduced time for the corresponding infrasound detections? This could then allow for an interpretation of links between array parameter output as a function of time (and the associated waveforms) in the context of the different source regions and features.

A separate back-projection image per station would also allow the reader to better follow and assess the discussion in the last paragraph of Section 3.

**RESPONSE:** We added additional back projection maps for each station in the supplementary section. They support the discussion in the text, e.g. pointing out that the 127°E sources are just in the I40PG data (and possibly related to something else as already stated in the text). The source constraints for each station should be clearer identified and the major influence of I07AU on the PMCC pixel maxima should be seen as well. It is hardly possible to generate a color-coded event density map on the one hand and provide coloring for the timing on the other hand, so (for supplementary material) we keep with the event density coloring. The supplementary figures are mentioned in the manuscript text at the first introduction of the cumulative figure 5 and at multiple places during the discussing to allow the reader to better follow and assess it, as suggested by the reviewer.

3) Suggested references to add:

- Studies including back-projection of infrasound recordings: Assink et al. (2018); Walker et al. (2013).
- A study which shows observations of infrasonic waves generated by seismic surface waves along the Rocky Mountains: Young and Greene (1982).

**RESPONSE:** References were added to the introduction and the discussion, where they fitted best.

4) Atmospheric model product:

From which ECMWF atmospheric model product are the wind and temperature fields extracted?

**RESPONSE:** The product was specified in the data section: "Atmospheric wind and temperature profiles are derived from operational high-resolution atmospheric model analysis, defined by the Integrated Forecast System of the ECMWF, available at <https://www.ecmwf.int/>".

5) Transmission loss:

The transmission loss is estimated both using parabolic equation simulations in a lossy medium, and using a semi-empirical formula. However, I find a potential confusion in the mixed use of the concepts of attenuation and transmission loss in the text. Figure 3 and Figure 4 display the results of transmission loss estimates using the two techniques. If you agree on this viewpoint, I propose to streamline the language and the discussion of the

associated results to underline that both approaches are applied to calculate transmission loss.

For example, line 137 can be confusing. It could be modified from:

*In both attenuation and propagation modeling, data from the European . . .*

into:

*In both the semi-empirical and the parabolic equation-based transmission loss estimates, data from the European . . . .*

Moreover, it would be interesting to see a direct comparison between the two transmission loss estimates as calculated for the station sites.

**RESPONSE:** We streamlined the manuscript to replace the mixed language concept of attenuation and transmission loss modeling by the sole use of the term transmission loss. We keep the concept of propagation modeling as a second technique and clarified the differences and benefits of those two concepts both applied in the study: "Transmission loss calculations using firstly a semi-empirical method for a horizontal representation (map view, figure 3) and secondly a parabolic-equation-based propagation model for a vertical representation (cross section, figure 4) are performed...". We modified line 137 according to the reviewer's suggestion and screened the manuscript for further passages to be changed in this context.

#### 6) Nomenclature:

- I suggest homogenizing the wording related to the concept of *back-projection*. The paper also uses *backtracking* and *back-tracking*, while some other works in addition consider a more general concept of *back-propagation*. If the mix is intentional, a more concise explanation is needed. Otherwise, I suggest using only one of the constructs in the text.

- The paper could be clearer and more consequent on the use of the different physical infrasound and seismic wave generation processes considered in observations, analyses, and figure labels. Currently, the constructs *epicentral infrasound*; *seismoacoustic signals*; *secondary infrasound*; *seismoacoustic precursors*; *seismoacoustic successors*; *secondary signals* are used, and I think the readers would appreciate a consolidated use and definition of these concepts.

I'm not sure whether the definition of *seismoacoustic waves* provided on Line 79 is appropriate:

*. . . also highlight infrasound generated from secondary phenomena like remote ground motion of mountain chains or extended basin areas, and from tsunami waves hitting the coastline. This secondary infrasound is often called seismoacoustic waves, . . .*

Is epicentral infrasound supposed to be included in your definition of a seismoacoustic waves?

#### **RESPONSE:**

- The nomenclature was modified to a homogenized use of "back projection" throughout the manuscript according to both reviewers' suggestions

- The nomenclature was harmonized regarding the use of epicentral and seismoacoustic sources. We harmonized the manuscript to no further use the wordings "secondary" (after the introductory definition), as well as no further use of "precursors" and "successors" and keep with only the two concepts of "epicentral infrasound" and "seismoacoustic".

- Infrasound from epicentral ground movement is defined in paragraph 3 of the introduction, seismoacoustic waves by remote terrain features in paragraph 4 of the introduction. I think the sentence clarified that epicentral infrasound is NOT included in the definition of seismoacoustics (which is described needing "seismic waves" and "distant terrain features"). To reduce confusion, we moved the mentioning of tsunami waves away from the end of the sentence and added a clarifying repetition of "by remote ground motion".

## **Specific text edit suggestions**

1) Line 107:

SING data is not shown, which makes it difficult to assess the summary given on these data signatures. I propose including a SING signal plot either in the paper body or in an appendix.

RESPONSE: A SING signal plot and an INFERNO analysis of it is added to the supplement, both giving a representation of the SING station data and the INFERNO method. Manuscript text refers to the supplementary figure in two adequate passages.

2) Line 116:

I would advise including a reference or explanation to describe what is an NDC and what is the NDC-in-a-box software.

RESPONSE: There is no reference, at least in paper, about the NDC-in-a-box. Nevertheless we added some lines describing the NDC-in-a-box software as well as the PMCC application in more detail. We also added an extended description of NDC, since it is the first appearance of this acronym.

3) Line 124:

It needs to be better clarified what is meant when claiming that *the propagation of signals* can be identified from the apparent velocity and frequency content.

I assume this would be related to identification of the atmospheric ducts penetrated by the acoustic waves (tropospheric / stratospheric / mesospheric / lower thermospheric?)

RESPONSE: the “propagation” was changed to “propagation path” and stratospheric and thermospheric ducting was added for clarification, including a reference to Drob et al. 2003, following the remark of both reviewers. Since this is only the method section, we do not explain how the method-derived apparent velocity and frequency content are used for discriminating seismic and acoustic signals as well as stratospheric or thermospheric ducted infrasounds. This is done later on in section 3.

4) Line 130:

I suggest including a concise statement of the parameters that go into the calculation, preferably complemented by the full equation for the semi-empirical transmission loss estimates. Is this equation 2 in Le Pichon et al. (2012)?

RESPONSE: The method is the same as used in equation 2 of Le Pichon et al., 2012, later enhanced in Tailpied et al., 2017. The method is already described in the text to be frequency- and range-dependent and depending on propagation calculations, all around the referred line 130. Later on, in the next paragraph, the effective sound speed (ratio) is described as the one most important parameter used for both methods. We think that it is unnecessary and probably misleading to add, explain and discuss the full formula here or to give more space for the method description, since it is referenced by two actual papers both containing and describing the method and the formula in larger detail. A third paper is in preparation but cannot be referenced before submission and acceptance.

5) Line 165:

How is the signal duration estimated?

RESPONSE: Signal duration estimation is described at the first text passage in section 3 where actual durations of 25 and 44 min for I39PW and I07AU are discussed: it is “derived

from the width of the high-frequency part signals originating from epicentral directions in the PMCC analyses”.

6) Line 168:

I'm not sure celerity is best described as *speed over ground*? Maybe you could use, e.g., *ratio of the range to the travelttime*, or *epicentral distance divided by the travelttime*?

RESPONSE: we modified the description of celerity according to the reviewer's suggestion.

7) Line 178 (Figure 2):

- Would a separation of this figure into four labeled subfigures (one per station) make the grouping of the subpanels more apparent? I think the readability of Figures 2–4 would also benefit from using a larger text label font (or larger figures).
- The middle panel labels for each station say *signal speed*, while the paper text otherwise uses *apparent velocity*. I think this should be consolidated.
- Suggested clarification: *are sorted by distance from above* → *are ordered by epicentral distance*.
- The caption should explain what the labels SA and IS denote. (Possibly the label IS should also be modified – see the related nomenclature remark above.)
- Would it be possible to indicate celerity values related to the earthquake epicenter and origin time in the horizontal axis?
- What apparent velocity is applied in the generation of the beams plotted in the lowermost station panels?
- For the topmost station data analysis panels, the color scale goes from 0° to 180°, indicating that the display shows the absolute value of the backazimuth deviation? Intuitively, I would assume that plotting the deviation including its sign could provide additional information to the reader, for example regarding the presence of an *azimuthal sweep* as discussed in Section 3?

RESPONSE:

- We labeled the subfigures with a,b,c,d (one per station) for a more apparent grouping of the subplots. Label text size was slightly increased, but otherwise much larger text fonts were not possible since too much information would be hidden or suppressed when enlarging the fonts. Discussion with the journal can specify in the end if the final size of the figure allows text readability or if further modifications are necessary.
- Signal speed is changed to apparent velocity in the figure in a consolidated way
- Clarifications were made to the caption regarding figure order and “IS”/“SA” labels
- Regarding celerity information in the figure 2 as a horizontal axis (similar as to the font size reply): more information added to the already quite dense figure 2 is not possible due to available space and would in our opinion not help the reader much more. We refer to table 1 for celerity values
- Apparent velocities used for the beamforming: used are the observed mean back-azimuth and apparent velocity values found for the whole PMCC pixel family, as listed in the last two rows of table 1
- We added supplementary figures which do not focus on absolute deviation of back-azimuth but on a narrow range of back-azimuths. This highlights the azimuthal sweep at I07AU and includes additional information, e.g. a larger frequency distribution at I39PW. See separate comment 9 for further details.



8) Line 189 and the rest of this paragraph:

- When stating *all four arrays*, I assume you are referring to the four arrays displayed in Figure 2?
- I cannot clearly distinguish the mentioned *quasi-continuous seismic waves* in the IS40 and IS30 displays.
  - The reference to *source: USGS* needs to be specified. You could also consider marking the USGS bulletin aftershock arrival times in Figure 2.
  - Last sentence: not only the apparent velocity, but also the backazimuth deviation can provide information valuable for identification of these phases. You also could consider moving the last sentence to the beginning of the paragraph.

#### RESPONSE:

- yes, all four arrays displayed in Figure 2 were meant, clarification added to the manuscript (also considering next bullet point changes)

- everything with apparent velocities above 1 km/s (blue) and azimuth directions towards the epicenter (yellow) in the low frequencies (0.05Hz – 0.5Hz) following the event is mentioned to be “quasi-continuous” seismic waves. They last for about 1-2 hours following the event, in IS40 it is quite similar to IS07 and IS39. Maybe it is difficult to say “continuous”, this is why it was stated “quasi”, and especially I30JP data, after reconsideration, is mixed up with aftershocks or other seismic activity near Japan and from different directions. Maybe the distance to I30JP is also too large to see seismic-wave-shaking of the instruments. Taking this into account the manuscript text about I30JP was modified to state “and possibly I30JP”.

- Reference is specified to the USGS event page for the Sulawesi 2018 event, also see other comments by both reviewers to this. Since the seismic waves are not the focus of this study, we chose to not give any markers to the main seismic event or aftershocks in the figure, it seems the figure is crowded enough.

- backazimuth information is added to the sentence. The sentence could be in the beginning of the paragraph, yes, kind of introducing seismic waves at infrasound sensors, but it is also positioned not too bad for a conclusion that infrasound sensors work fairly well as seismic sensors. In our opinion it is better stated here, since the seismic observations are then already described, and we keep it as is.

9) Line 211:

The reported *azimuthal sweep* between 3° and 8° is difficult for me to distinguish in Figure 2. I would recommend a separate figure which plots backazimuth as a function of time for the different stations during the relevant time window. This would allow for an assessment of the mentioned azimuthal sweep present at IS07 (as well as the absence of a sweep at the other stations).

RESPONSE: A supplementary figure was added which highlights the azimuthal sweep at I07AU and certain other features as well as the absence of such an explicit sweep at the other stations. It is referenced in the manuscript text where the azimuthal sweep is mentioned. The according lines were modified to provide the necessary information about azimuth deviations pointing at the supplementary figure and it's caption for further details.

10) Line 228:

*... their later arrival time and lack of high-frequency content correspond to the long lasting signal families following the main signal peak for many minutes in the low frequencies. These signal families can be observed together with low-frequency seismic*

*wave activity and low frequency acoustic components from the stratospheric ducting, discernible only to a certain degree by the apparent velocities and arrival times.*

Is there a way to guide the reader on how to find these thermospheric arrivals in the data shown in Figure 2? For example, you could highlight the relevant time and frequency regimes with boxes.

The second sentence could benefit from being split.

RESPONSE: The manuscript text was modified to name the approximate time and frequency regimes of the thermospheric arrivals. Similar to other replies, we think that figure 2 is already crowded enough and introducing further axes, boxes and areas do not support the reader in mastering this figure. We split the sentence in two parts according to the reviewer's suggestion.

11) Line 270:

I recommend making it more clear to the reader what kind of estimates that were made using the INFERNO software.

Is the claim that the acoustic energy is concentrated around 0.2 Hz based on estimates made in the current study, or is it based on general knowledge from previous works on earthquake-generated infrasound?

Does this refer to the energy spectral content at the source or at the stations?

As a suggestion, you could provide a display of the infrasonic spectral signature(s) at the station(s), and/or an estimate of the spectral components at the source – depending on what is the most relevant.

RESPONSE: The INFERNO software, its key features and its application within this study is elaborated in more detail in the given passage, following the recommendation of both reviewers. The energy concentration around 0.2 Hz was derived by applying INFERNO on station data for the current study. A display of the single sensor SING spectral components using INFERNO is provided as a supplementary figure.

12) Line 315:

Would it be useful to also list the celerity values found in the simulations?

RESPONSE: Celerity values were derived from ray-tracing simulations (see next comment: 287-293 m/s), but it is more difficult to derive celerity values from a PE, since the output is a 2-D transmission loss field and not a path that you can follow with a certain travel time. So we stick to quantifying celerity by the raytracing and the observations.

13) Line 320:

*... celerities of those stratospheric ducts to be in the order of 290 m/s.*

Can you quantify what is meant by *in the order of*?

RESPONSE: Text passage specified to the model values between 287 and 293 m/s.

14) Line 329:

My understanding is that the PAPE code supports a range-dependent atmospheric model when simulating the wave propagation and estimating the associated transmission loss. However, from the last sentence in the Figure 4 caption, I get the impression that you indeed consider a 1-D  $v_{\text{eff}}$  profile?

If a 1-D approximation of the atmosphere is applied (which might well be an appropriate approximation), I think it should be clarified why this is appropriate, e.g., by showing how much the  $v_{\text{eff}}$  profiles vary along the great circle connecting the event and the stations.

RESPONSE: Range-dependent PE modeling is performed (so 2-dimensional  $v_{\text{eff}}$  profiles), the last sentence of the figure 4 caption was indeed quite misleading. We changed it accordingly: "An averaged effective sound speed profiles ( $v_{\text{eff}}$ ) is shown for each station." 1-D approximation is not applied.

15) Line 332:

Maybe you could also show propagation results generated for a lower frequency?

RESPONSE: The choice of 1 Hz is a compromise between the 0.2 Hz (figure 3a) of the low-frequency acoustic energy maximum and the 3 Hz (figure 3b) of the high-frequency signal content which is unique for the stratospheric ducted signal parts. It is also a matter of necessity to be able to present the stratospheric ducts in a clear and concise figure. When going to lower frequencies, there is less attenuation and higher wavelengths and the modeling as well as picture becomes less detailed and more blurred, losing the clear optical representation of the stratospheric waveguides which are the main message of the figure.

16) Paragraph starting on line 361:

- For what time intervals (and frequency ranges) are the respective station array processing output back-projected?
- The sentence starting with *The uncertainties of the measurements . . .* is difficult for me to interpret.

RESPONSE:

- The complete station array output shown in figure 2 is back-projected, also covering the complete frequency range shown from 0.01 to 4.4 Hz. The only main restriction is that the signals for PMCC internal back projection are limited to a back-azimuth angle pointing towards the epicenter plus/minus 40 degree (we tried versions with 10, 20 and 40 degree and chose the largest version to keep any signal potentially associated to the earthquake). Of course this might exclude some (singular) pixels from directions larger than 40 degree back azimuth deviation, but those might be unassociated anyway. In this case the majorities of signals by microbaroms and surf are excluded by this approach and epicentral or seismoacoustic signals potentially related to the earthquake are included. We added this previously unmentioned +/- 40 degree maximum deviation to the manuscript text.

- We rephrased the sentence about the uncertainties for this method and split it into three parts for clarification.

17) Line 377:

The colorbar title *Number of events* can be confusing, because we consider signals from a single earthquake event. Is it appropriate to instead write *Number of PMCC pixels*?

RESPONSE: the title "Number of events is changed to "Number of PMCC pixels" according to the reviewer's suggestion.

18) Line 393:

As mentioned also above [*Recommendation on specific aspects, remark 2*]), the discussion regarding association between station-data segments and signatures in the



consolidated back-projection map would be facilitated if separate maps were provided per station.

RESPONSE: Separate maps are provided in the supplementary section, see authors reply to the Recommendation on specific aspects, remark 2, for further details.

19) Line 483:

The relevance of this study to CTBT verification and related infrasound monitoring is not so clear from the text. Maybe links can be provided to the objectives of studies like Assink et al. (2018, 2016); Bowman (2019); Gaebler et al. (2019)? [Which could be given in the Introduction if preferred.]

RESPONSE: Although we find it unusual to end a publication with references, we follow the reviewer's suggestion (it did not fit so well in the introduction either) and add a link and the references to other studies.

## Technical remarks and corrections

1) Title date format:

Looking at previous NHESS papers, it seems like dates in the title are given in the format "28 September 2018", instead of the format "September 28th 2018" used in the submitted manuscript.

RESPONSE: date format modified throughout the manuscript according to reviewers suggestion.

2) Line 55:

Is there a reference or DOI available which allows for citing the USGS analysis of the event?

RESPONSE: there is a USGS event page to the Sulawesi 2018 earthquake, which we referenced according to the reviewer's suggestion.

3) Line 65:

Suggested clarification: *The intense ground shaking of either the epicentral region or the or the nearby topography from the Sulawesi earthquake* → *The intense ground shaking of either the epicentral region or the topography nearby the Sulawesi earthquake*

RESPONSE: modified according to reviewer's suggestion.

4) Line 69:

Suggested clarification: *to highly sensitive infrasound arrays* → *to be recorded at highly sensitive infrasound arrays*

RESPONSE: modified according to reviewer's suggestion.

5) Line 83:

Suggested replacement: *Although there is quite a large number of studies* → *Although there are many studies*

RESPONSE: modified according to reviewer's suggestion.

6) Line 88:

Suggested replacement: *of a* → *related to a*

RESPONSE: modified according to reviewer's suggestion.

7) Line 89:

Suggested replacement: *Therefore, one of the main tasks of* → *Therefore, a main objective*

RESPONSE: modified according to reviewer's suggestion.

8) Line 99:

Suggested replacement: *Data from various infrasound arrays of the International Monitoring System (IMS) established under the Comprehensive Nuclear-Test-Ban Treaty (CTBT), are used within this study* →

*This study mainly considers data recorded at infrasound arrays of the International Monitoring System (IMS) established under the Comprehensive Nuclear-Test-Ban Treaty (CTBT).*

In addition, a reference could be given to key literature describing the IMS.

RESPONSE: modified according to reviewer's suggestion. References added to the Le Pichon Springer books for IMS and infrasound array descriptions.

9) Line 111:

I think the epicenter symbol shown is rather a star than an asterisk? (Not sure.)

RESPONSE: Yes, changed to "star".

10) Line 197:

Suggested clarification: *since the local infrasound observations generated from* → *microbarometer output generated from*

RESPONSE: modified according to reviewer's suggestion.

11) Line 198:

Suggested clarification: *fairly well as seismic arrays here* → *fairly well as seismic arrays for this event*

RESPONSE: modified according to reviewer's suggestion.

12) Line 206:

Suggested clarification: *... since the back-azimuth calculations as well as the beam-forming are focused on the respective theoretical back-azimuth for the epicenter*

*calculated for each station. → ... where the array beams are focused towards the earthquake epicenter.*

RESPONSE: shortened and clarified similar to the reviewer's suggestion.

13) Line 237:

As a service to readers not familiar with microbaroms, I would suggest providing a sentence or two plus some key literature reference that explains what is a microbarom signal.

RESPONSE: a short explanation to what are microbaroms is added to the manuscript as well as two literature references for further reading.

14) Line 243:

Suggested clarification: *acoustic velocities* → *acoustic apparent velocities*.

RESPONSE: modified according to reviewer's suggestion.

15) Line 248 (and the final paragraph of Section 3):

To facilitate reading this discussion, islands mentioned in the text could be labeled in at least one of the map figures.

RESPONSE: Islands are labeled in figure 1 (Borneo and Sulawesi) as well as in figure 5 (Borneo, Sulawesi, North Maluku) according to the reviewer's suggestion.

16) Line 255:

This sentence can be hard to follow, I suggest to re-formulate and/or split it.

RESPONSE: We slightly re-formulated the sentence and split it into two parts for clarification.

17) Line 287:

This sentence can be hard to follow, I suggest to re-formulate and/or split it.

RESPONSE: this sentence and the following one were slightly re-formulated for clarification.

18) Line 337:

*The stability of the ducting conditions are best expressed by quantifying the effective sound speed ...*

I don't expect the effective sound speed ratio is providing the *best* estimate of the acoustic duct availability. For example, wave-propagation modelling can provide a more detailed analysis. Possible alternative formulation:

*The availability of atmospheric ducts can be quantified using the effective sound speed ...*

RESPONSE: modified according to reviewer's suggestion.

19) Line 346:  
This sentence is not so clear to me.

RESPONSE: The sentence was restated to improve clarification.

20) Line 396:  
Suggested replacement: *ground movement* → *ground motion*.

RESPONSE: modified according to reviewer's suggestion.

21) Line 461:  
I recommend to split and re-formulate the sentences in this paragraph.

RESPONSE: Sentences were split and re-formulated according to the reviewer's suggestion.

22) Line 467:  
I recommend to split and re-formulate the sentences in this paragraph.

RESPONSE: Sentences were split and re-formulated according to the reviewer's suggestion.

23) Line 473:  
This statement is vague – maybe it can be omitted without loss?

RESPONSE: statement omitted according to reviewer's suggestion.

24) Line 478, sentence starting with *Taking into account...*:  
Can this be re-formulated and split?

RESPONSE: Sentence was split and re-formulated according to the reviewer's suggestion.

1 **Infrasound and seismoacoustic signatures of the 28 September ~~28<sup>th</sup>~~-2018 Sulawesi super shear**  
2 **earthquake**

3  
4  
5 Christoph Pilger<sup>1</sup>, Peter Gaebler<sup>1</sup>, Lars Ceranna<sup>1</sup>, Alexis Le Pichon<sup>2</sup>, Julien Vergoz<sup>2</sup>, Anna Perttu<sup>3</sup>,  
6 Dorianne Tailpied<sup>3</sup>, Benoit Taisne<sup>3</sup>

7  
8 1 – BGR (Federal Institute for Geosciences and Natural Resources), Hannover, Germany  
9 2 – CEA, DAM, DIF, 91297 Arpajon, France  
10 3 – EOS / NTU (Earth Observatory of Singapore / Nanyang Technological University), Singapore

11  
12 Corresponding author: Christoph Pilger; BGR, Hannover, Germany; christoph.pilger@bgr.de

13  
14 **Abstract**

15 A magnitude 7.5 earthquake occurred on 28 September ~~28<sup>th</sup>~~-2018 at 10:02:43 UTC near the city of Palu  
16 on the Indonesian island of Sulawesi. It was a shallow, strike-slip earthquake with ~~fractures up to the~~  
17 ~~surface and~~ a rupture extending to length of about 150 km and reaching the surface. Moreover, this  
18 earthquake was identified as one of very few events having a super shear rupture speed.

19 Clear and long-lasting infrasound signatures related to this event were observed by four infrasound  
20 arrays of the International Monitoring System of the Comprehensive Nuclear-Test-Ban Treaty  
21 Organization as well as by one national infrasound station in Singapore. Although these infrasound  
22 stations SING (Singapore), I39PW (Palau), I07AU (Australia), I40PG (Papua New Guinea) and I30JP  
23 (Japan) are located in large distances between 1800 km and 4500 km from the earthquake's epicentral  
24 region, the observed infrasound signals associated to this event were intense, including both seismic  
25 and acoustic arrivals. ~~The seismic-to-acoustic coupling at nearby terrain features is supposed to~~  
26 ~~generate distinct infrasonic signatures clearly recordable at remote infrasound arrays.~~

27 A detailed study of the event-related infrasound observations and the potential infrasound generation  
28 mechanisms is presented covering range-~~and time~~-dependent infrasound ~~attenuation-transmission~~  
29 loss and propagation modeling, characterization of the atmospheric background conditions as well as  
30 identification of the regions of seismoacoustic activity by applying a ~~backtracking-back projection~~  
31 method from the infrasound receivers to potential source regions. ~~The~~is back-projection of infrasonic  
32 arrivals allows to estimate that the main infrasound source region for the Sulawesi earthquake is  
33 related to the extended rupture zone and the nearby topography. This estimation and the comparison  
34 to other super shear as well as large regional earthquakes identifies no clear connection between the  
35 earthquake's super shear nature and the strong infrasound emission.

36  
37 **Keywords**

38 Infrasound; seismoacoustics; ~~attenuation~~; propagation modeling; Sulawesi; super shear; earthquake;  
39



## 40 1. Introduction

41 Indonesia is located in a region with a very high rate of natural seismicity above a complex setting of  
42 plate tectonics. Subduction zones of convergent plate boundaries in this region define the largest faults  
43 of the Earth's crust, and the region of highest and most intense earthquake activity. In fact, some of  
44 the strongest and most destructive earthquakes recorded during the last decades have occurred in  
45 Indonesia, like the 2004 moment magnitude (Mw) 9.3 Sumatra-Andaman earthquake and various  
46 other events with Mw larger than 8 (*Pailoplee, 2017*). These strong offshore events can often generate  
47 large and devastating tsunamis. Additional crustal scale faults are also located on the Indonesian island  
48 of Sulawesi, including the Palu-Koro fault transecting the Northern part of the island (*Katili, 1978*). The  
49 Frequent seismic activity is associated to this fault was quantified using the United States Geological  
50 Survey (USGS) nearby seismicity data link (USGS, 2018), resulting in at least 60 earthquakes larger than  
51 magnitude 5 within the last 20 years and four events larger than magnitude 6 previous to the event  
52 discussed in this study.

53 The 28 September 28<sup>th</sup>-2018 Sulawesi earthquake occurred at 10:02:43 UTC near the Indonesian city  
54 of Palu on the island of Sulawesi. It was estimated by the United States Geological Survey (USGS) as a  
55 Mw 7.5 strike slip earthquake (*USGS, 2018*) along the Palu-Koru fault with a hypocenter location of  
56 0.256°S and 119.846°E and a depth of about 20 km. Modeling indicates that the majority of the slip  
57 occurred shallow on the fault (above 10 km) with an offset of up to 7 m horizontal slip and a dip slip of  
58 up to only 2 m (*Socquet et al., 2019*). The rupture zone of the event extended north-to-south over  
59 roughly 150 km, along the fault and through the city of Palu, with a high rupture velocity of 4.1 km/s  
60 in average. This indicates it to be a so called super shear event having rupture velocities higher  
61 than the corresponding shear velocities (see Bao et al., 2019; Socquet et al., 2019). The phenomenon  
62 is comparable to the acoustic sonic boom, an effect where the source travels faster than its emitted  
63 waves. Analogous to acoustics the super shear rupture generates a shear wave mach cone, which may  
64 cause enhanced ground motion and result in increased damage potential (Bernard and Baumont, 2005;  
65 Doan and Gary, 2009). The Sulawesi earthquake resulted not only in intense ground shaking up to  
66 "considerable damages" of Modified Mercalli Intensity IX, but also in liquefaction, landslides, and local  
67 tsunamis within Palu bay (see *Heidarzadeh et al., 2019; Omira et al., 2019; Jamelot et al., 2019*). A large  
68 number of precursory earthquakes as well as aftershocks happened in the course of occurred  
69 surrounding this event.

70 The intense ground shaking of either both the epicentral region and the nearby topography  
71 from nearby the Sulawesi earthquake resulted in strong and clearly observed infrasound signatures,  
72 which are the focus of this study. Infrasound, which is the sub-audible part of acoustic waves below 20  
73 Hz, is generated by a large number of natural and anthropogenic sources (e.g. see *Le Pichon et al.,*  
74 *2010, 2019*) and can propagate over distances of thousands of kilometers with little attenuation to be  
75 recorded at highly sensitive infrasound arrays. Many sources of either explosive or eruptive  
76 characteristic, or those coming along with large mass movements can generate infrasound (e.g.  
77 *Gibbons et al., 2015a; Pilger et al., 2018*), including earthquakes.

78 Reports on infrasound from earthquakes in the USA (*Mutschlecner and Whitaker, 2005*) as well as in  
79 Peru, China and Chile (*Le Pichon et al., 2002, 2003, 2006*) indicate that the epicentral ground  
80 movement generates infrasonic pressure waves. Further studies on the Mw 9.3 Sumatra-Andaman  
81 earthquake (*Le Pichon et al., 2005*), the Mw 9.0 Tohoku earthquake (Walker et al., 2013) and on Italian  
82 earthquakes (*Marchetti et al., 2016; Shani-Kadmiel et al., 2017; Hernandez et al., 2018*) also highlight  
83 infrasound generated from tsunami waves hitting the coastline and from secondary phenomena like  
84 remote ground motion of mountain chains or extended basin areas, and from tsunami waves hitting  
85 the coastline. This secondary infrasound by remote ground motion is often called seismoacoustic

86 waves, since the seismic waves (longitudinal, shear or surface) generated by an earthquake propagate  
87 to distant terrain features where the wave energy is partly converted to atmospheric acoustic waves  
88 in the infrasound frequency range (e.g., see *Arrowsmith et al., 2010; Hedlin et al., 2012*).

89 Although there ~~are many is quite a large number of~~ studies about infrasound generated by  
90 earthquakes, only a small number of earthquakes with a super shear rupture speed have been  
91 identified within the last 20 years (e.g. Izmit/Turkey in 1999, see *Bouchon et al., 2000*;  
92 Kunlunshan/Tibet in 2001, see *Bouchon and Vallee, 2003*; Denali/Alaska in 2002, see *Dunham and*  
93 *Archuleta, 2004*; Quinghai/China in 2010, see *Wang and Mori, 2012*; Craig/Alaska in 2013, see *Yue et*  
94 *al., 2013*), and only one publication known to the authors identifies and investigates infrasound  
95 observations ~~related to~~ a super shear earthquake, namely the Denali 2002 earthquake (*Olson et al,*  
96 *2003*). Therefore, ~~one of the main tasks~~ a main objective of this paper is to investigate the potential of  
97 a connection between super shear earthquakes and infrasound recordings of large amplitude.

98 This paper is structured as follows: Section 2 describes the data and methods applied within this study;  
99 section 3 highlights the observations of epicentral infrasound and seismoacoustic signatures at remote  
100 infrasound arrays; section 4 describes the modeling of infrasound ~~attenuation-transmission loss as well~~  
101 ~~as~~ propagation and compares it to the observations; section 5 provides a ~~back-tracking~~ back  
102 projection approach to identify the acoustic source regions of the observed signals and discusses the  
103 event in comparison with similar earthquakes.

104

## 105 2. Data and Methods

106 This study mainly considers data recorded at infrasound arrays of the International Monitoring System  
107 (IMS, e.g. described in *Le Pichon et al., 2010, 2019*) established under the Comprehensive Nuclear-  
108 Test-Ban Treaty (CTBT). Data from various infrasound arrays of the International Monitoring System  
109 (IMS) established under the Comprehensive Nuclear Test Ban Treaty (CTBT), are used within this  
110 study. Figure 1 shows the earthquake epicenter as well as the nearest stations around the event. The  
111 earthquake epicenter, as well as the nearest infrasound stations in distances between 1800 km and  
112 4500 km around the event, are shown in figure 1.

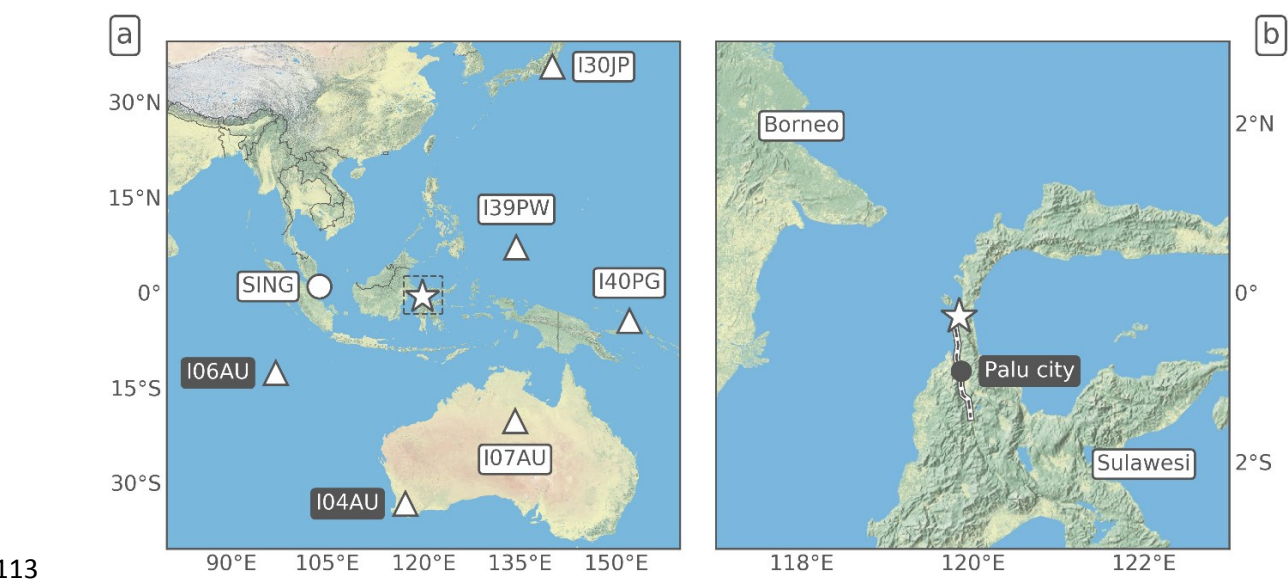

113

114 *Fig 1: a) Map of the Sulawesi earthquake epicenter (star) and the locations of the nearest*  
115 *surrounding infrasound stations (the circle corresponds to a single-sensor station, the triangles to multi-*

116 sensor IMS arrays; white-labeled stations registered the event, black-labeled ones did not). b) Zoom of  
117 the epicentral source region showing in larger detail the rupture zone passing through the city of Palu.

118

119 The two IMS infrasound stations closest to the earthquake epicenter clearly registered the event  
120 (I39PW in Palau and I07AU in Northern Australia, see section 3). Two further IMS stations at larger  
121 distances found clear indications of signals related to the earthquake (I40PG in Papua New Guinea and  
122 I30JP in Japan, also see section 3). However, two other Australian stations (I04AU and I06AU) as well  
123 as all of the more distant IMS infrasound arrays recorded no signals related to the earthquake source.

124 Additional data from a single infrasound sensor in Singapore (SING) was investigated and also showed  
125 signatures related to the earthquake (see figure S1 of the supplement). However, due to a lack of array  
126 calculations and directional information by only a single sensor, no further studies are applied for this  
127 data.

128 The PMCC method (Progressive Multi-Channel Correlation, see *Cansi, 1995*); used in this study is  
129 available from the DTK-GPMCC application in the NDC-In-A-Box package. The main objective of the  
130 NDC-In-A-Box project is to offer to all National Data Centers (NDCs) of CTBT member states the  
131 capability to process and analyse seismic, infrasound and hydroacoustic data, and so to become active  
132 contributors to the verification regime of the CTBT. Technically, it consists of a number of automatic  
133 and interactive software tools which are packaged in a Virtual Machine distributed by the CTBT  
134 International Data Center (IDC). Among this set of software, DTK-GPMCC is the interactive array  
135 processing tool, it allows to configure and run the PMCC detector from waveforms of any technology,  
136 and to display and analyze the results. PMCC is applied to the raw differential pressure recordings at  
137 each of the IMS infrasound arrays' microbarometers to derive advanced data parameters like back-  
138 azimuth, apparent velocity and frequency content of coherent signals thereby associated to different  
139 events (see figure 2). Back-azimuth reflects the horizontal direction of signal origin, while apparent  
140 velocity indicates the arrival inclination, where higher values correspond to propagation from higher  
141 altitude ducts. Signals are identified as pixel information in distinct time steps and frequency bands  
142 and are clustered to signal families related to the same event. 1/3 octave band configurations with an  
143 inverse frequency distributed window length are implemented between 0.01 and 4.4 Hz (*Garces,*  
144 *2013*). Signals can be associated to a certain source by e.g. applying cross bearing techniques on the  
145 back-azimuth directions of two or more arrays (*Matoza et al., 2017*). The seismic or acoustic origin as  
146 well as the propagation path of signals, e.g. ducting via stratosphere or thermosphere (*Drob et al.,*  
147 *2003*), can be inferred from identified by the apparent velocity and frequency content of the  
148 recordings.

149 In order to further investigate and understand the infrasound detection pattern in the region following  
150 the Sulawesi earthquake, various simulations were performed to compute acoustic attenuation  
151 transmission loss and to simulate infrasound propagation between the source and the stations.  
152 Infrasound attenuationtransmission loss at surface level (see figure 3) was calculated using a  
153 frequency-dependent, semi-empirical modeling technique coupled with realistic atmospheric  
154 specifications along the infrasound propagation path (*Le Pichon et al., 2012; Tailpied et al., 2017*) in  
155 order to draw a range- and frequency-dependent attenuation map estimating the acoustic pressure  
156 loss between source and receivers in decibel (dB). The attenuation-transmission loss of the signal at  
157 each station is associated to a confidence index that integrates uncertainties from the propagation  
158 modeling and the atmospheric specifications. Infrasound propagation (see figure 4) was modeled using  
159 a two-dimensional Parabolic Equation method (NCPA PAPE, see *Waxler et al., 2017*) to quantify and  
160 visualize the ducting and well as amplitude decrease between source and receivers.

161 ~~In both the semi-empirical and the parabolic equation-based transmission loss estimates,~~  
162 ~~in both attenuation and propagation modeling,~~ data from the European Centre for Medium-range Weather  
163 Forecast (ECMWF) meteorological model are used to derive the effective sound speed as the most  
164 important background parameter for infrasound propagation. Indeed, this parameter, defined as  
165 adiabatic sound speed modified by horizontal winds in the propagation direction of the modeled  
166 sound, is used to provide the atmospheric background conditions along the propagation path between  
167 the source and the stations (Wilson, 2003). Ducting along tropospheric, stratospheric or thermospheric  
168 waveguides (Drob et al., 2003) can be estimated in the same manner as the total amplitude loss from  
169 geometric spreading as well as atmospheric attenuation (Sutherland and Bass, 2004). ECMWF values  
170 are used from 0 to 60 km altitude and merged with temperature and wind climatologies above  
171 (MSISE00 and HWM07, see Picone et al., 2002, Drob et al., 2008) to provide seamless effective sound  
172 speed profiles from 0 to 140 km altitude.

173 ~~Backtracking-Back projection~~ of the coherent earthquake-related signals observed at infrasound arrays  
174 to their source region is performed within this study using a seismoacoustic method similar to that of  
175 Marchetti et al. (2016) or Shani-Kadmiel et al. (2017), which is also part of the built-in capabilities of  
176 PMCC (see figure 5). Assumed is a conversion of the initial seismic wave with crustal propagation  
177 velocities of e.g. 4 km/s to acoustic waves with ~~an~~ average ~~celerities-speed~~ of e.g. 0.3 km/s at certain  
178 terrain features, like steep or flat topography as e.g. mountain chains, islands, cliffs or extended plains.  
179 This method identifies the seismoacoustic conversion areas and thus infrasonic source regions for the  
180 signals observed, taking into account for each PMCC pixel the arrival time and back-azimuth direction  
181 relative to a point source in space and time, here the Mw 7.5 earthquake epicenter. The cumulative  
182 sum and frequency of occurrence of the ~~backtrackedprojected~~ origin locations therefore allows to  
183 identify ~~seismoacoustic-infrasonic~~ source regions, either of epicentral or ~~secondary-seismoacoustic~~  
184 origin.

185

### 186 3. Observations

187 The 28 September ~~28<sup>th</sup>~~-2018 Sulawesi earthquake was identified in the recordings of four IMS  
188 infrasound arrays: I39PW, I07AU, I40PG and I30JP. Four to six hours of differential pressure recordings  
189 from these stations following the earthquake origin time (10:02:43 UTC) are analyzed using the PMCC  
190 method described in section 2. Signal parameters related to the earthquake are extracted from the  
191 PMCC results in terms of arrival time and duration as well as direction of origin (back-azimuth) and  
192 apparent signal velocity.

193 ~~Table 1 summarizes t~~These ~~observation~~ parameters for the four IMS infrasound arrays and for the  
194 earthquake-related signal also identified in SING station data are summarized in table 1. Furthermore,  
195 source-to-station distances as well as expected back-azimuth directions and arrival times using a  
196 celerity (epicentral distance divided by the travel times speed over ground) of 300 m/s are presented for  
197 comparison. ~~Figure 2 provides a~~ graphical representation of the waveform beams (bandpass-filtered  
198 between 0.6 and 4 Hz, except for I30JP, where it is 0.02 and 0.1 Hz) and the main PMCC findings ~~the~~  
199 ~~main findings~~ for the four IMS stations is provided in figure 2, highlighting epicentral infrasound arrivals  
200 and their acoustic characteristics in the observations but also seismoacoustic and seismic signatures  
201 related to the event.

202

203 Table 1: Findings from the observations of five infrasound stations and from theoretical distance-  
 204 azimuth calculations to the Sulawesi epicenter. Main signal groups are labeled with "IS" (infrasound)  
 205 and, secondary signals are labeled "SA" (seismoacoustic).

| Station                               | SING         | I39PW                  | I07AU                  | I40PG                  | I30JP     |
|---------------------------------------|--------------|------------------------|------------------------|------------------------|-----------|
| Distance to epicenter (km)            | 1788         | 1845                   | 2689                   | 3604                   | 4474      |
| Expected back-azimuth (°)             | 94           | 243                    | 322                    | 276                    | 213       |
| Expected 300 m/s arrival time (UTC)   | 11:42        | 11:45                  | 12:32                  | 13:23                  | 14:11     |
| Observed arrival time (UTC)           | IS) 11:50    | IS) 11:36<br>SA) 12:34 | IS) 12:08<br>SA) 11:22 | IS) 13:05<br>SA) 12:37 | IS) 14:30 |
| Observed signal duration (min)        | IS) 10       | IS) 25<br>SA) 7        | IS) 44<br>SA) 16       | IS) 24<br>SA) 8        | IS) 33    |
| Observed mean celerity (m/s)          | IS) 267      | IS) 290<br>SA) 200     | IS) 304<br>SA) 514     | IS) 309<br>SA) 380     | IS) 263   |
| Observed mean back-azimuth (°)        | - (no array) | IS) 251<br>SA) 257     | IS) 319<br>SA) 321     | IS) 275<br>SA) 276     | IS) 209   |
| Observed mean apparent velocity (m/s) | - (no array) | IS) 383<br>SA) 359     | IS) 356<br>SA) 371     | IS) 351<br>SA) 360     | IS) 436   |

206



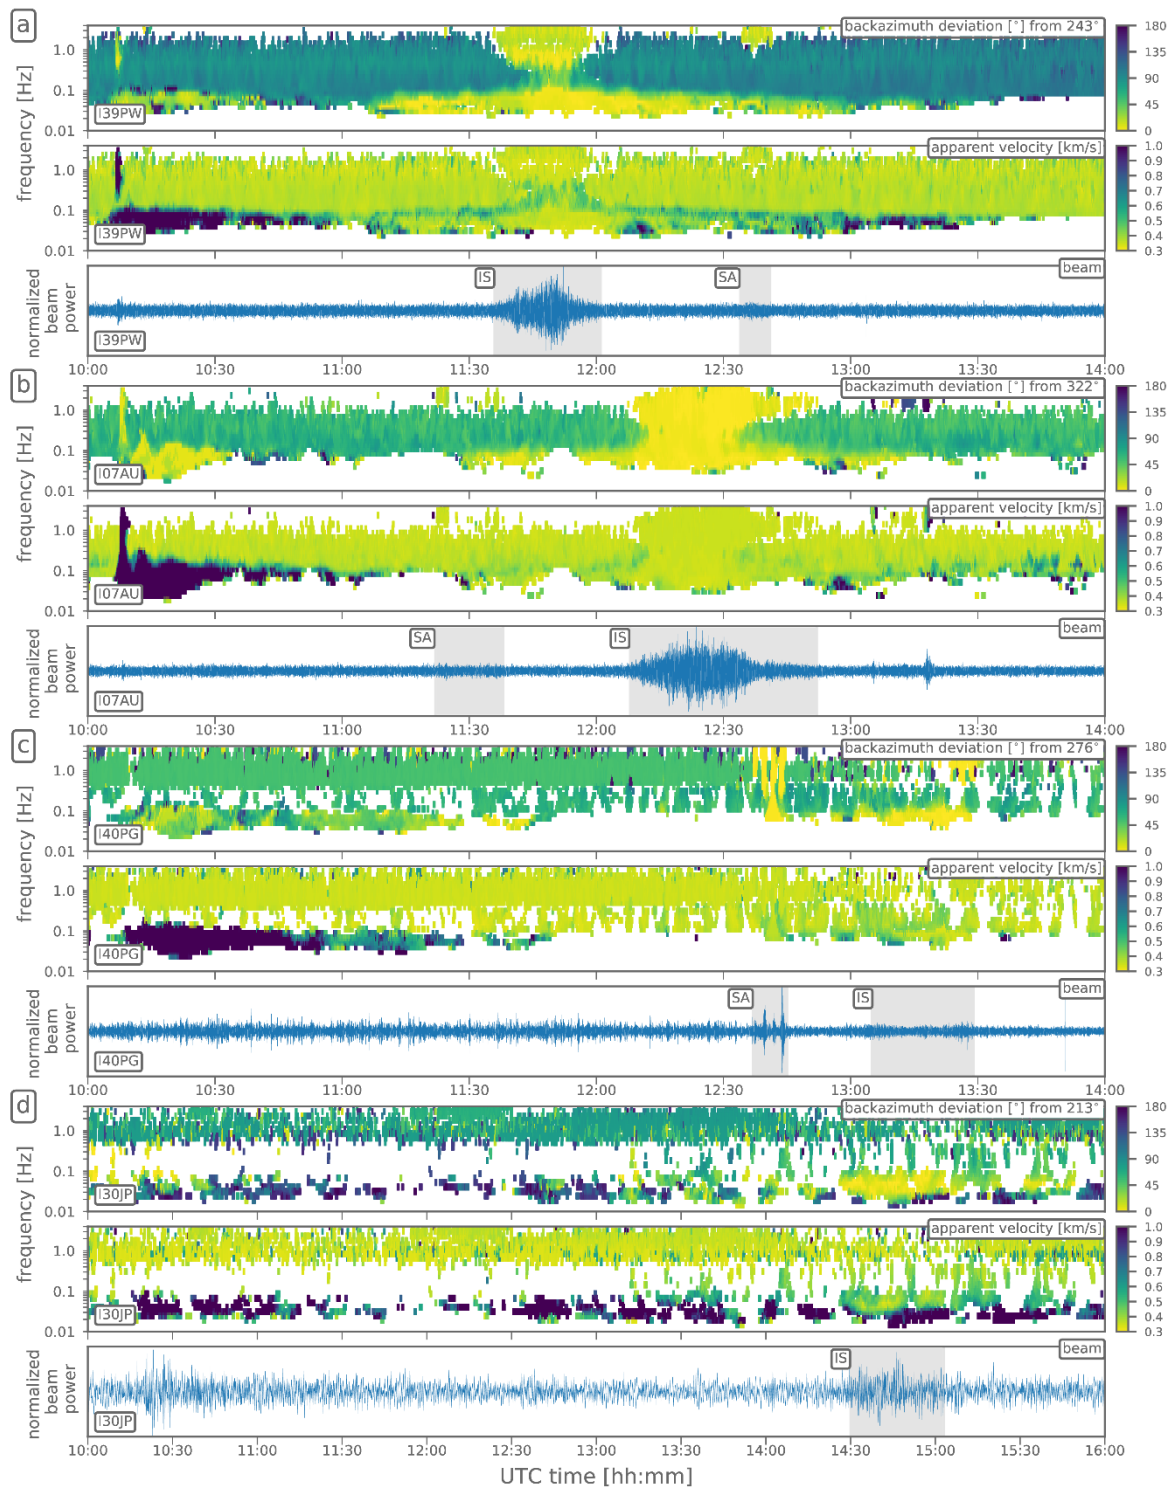

207

208 Fig 2: Waveform beams and PMCC-derived results for the four infrasound arrays I39PW (a), I07AU (b),  
 209 I40PG (c) and I30JP (d; stations are ordered sorted by epicentral distance from above, three frames per  
 210 station, station labels in the lower left corners). Shown in the corresponding stations' top frames  
 211 are the observed back-azimuth deviations from the direction to the earthquake epicenter (see labels in the  
 212 upper right corners), in the middle frame the observed apparent velocities, and in the bottom frame  
 213 the waveform beams. The whole 360° back-azimuth observations are converted to the given deviation  
 214 plotting of  $\pm 180^\circ$ . Apparent velocities are saturated above 1 km/s. Beams are bandpass-filtered  
 215 between 0.6 - 4 Hz and four hours of data are shown with the exception of I30JP where the beam is  
 216 bandpass filtered between 0.02 - 0.1 Hz and six hours of data are shown. Main infrasonic (IS) and  
 217 seismoacoustic (SA) signal groups (see table 1) are highlighted in grey.

219 ~~The main findings of the infrasound observations and PMCC analyses related to the earthquake are:~~

220 –Initial seismic waves with high-frequency components (0.3-3 Hz) are found in I39PW and I07AU data  
 221 arriving four to six minutes after the origin time, indicating apparent P-wave velocities of 4-10 km/s,  
 222 lasting about two minutes. These are followed by low-frequency (0.05-0.5 Hz), quasi-continuous  
 223 seismic waves observed ~~in I39PW, I07AU, I40PG and possibly I30JP~~~~in all four arrays~~, likely related to  
 224 seismic shear and surface waves, having velocities of 1-3 km/s. Aftershock activity as well as seismic  
 225 signals from other regional earthquakes are also present in figure 2 for the hours after the main  
 226 earthquake; aftershocks include 12 events of magnitude 5 or greater, and 40 events of magnitude 4 or  
 227 greater within six hours following the event (~~source: USGS, 2018~~). Values for the arrival of seismic  
 228 waves are not integrated in table 1, since the local ~~infrasound observations~~~~microbarometer output~~  
 229 generated from ground-shaking of the sensors are not the focus of this study. Nevertheless, the  
 230 infrasound sensors do work fairly well as seismic arrays ~~for this event~~~~here~~ (e.g. see *Gibbons et al.,*  
 231 *2015b*) and the earthquake related seismic arrivals can clearly be identified in figure 2 having ~~back-~~  
 232 ~~azimuths towards the epicenter and~~ apparent velocities exceeding 1 km/s (drawn with dark blue colors  
 233 in the middle frame plot of each station indicating seismic and not acoustic signal speeds).

234 –Epicentral infrasound is clearly observed and produces the main signal with the largest waveform  
 235 amplitudes in I39PW and I07AU (beams are plotted in figure 2 in the bottom frame plots of the  
 236 respective stations, signals are highlighted by grey rectangles and “IS” labels). The analysis shows a  
 237 broadband-frequency content (0.05 to 4.4 Hz) and long signal durations of 25 and 44 minutes ~~(derived~~  
 238 ~~from the width of the high-frequency part signals originating from epicentral directions in the PMCC~~  
 239 ~~analyses)~~. ~~Figure 2 emphasizes t~~~~These signals are emphasized in figure 2,~~ since the back-azimuth  
 240 calculations as well as the ~~array beams~~~~beamforming~~ are focused ~~towardson the respective theoretical~~  
 241 ~~back-azimuth for the earthquake~~ epicenter ~~calculated for each station~~ (yellow colors in the azimuth  
 242 frame of each station indicating low to zero back-azimuth deviations from this ~~direction~~~~value~~). The low  
 243 deviations from the theoretical back-azimuth directions (3° and 8°, see table 1 for the corresponding  
 244 values) confirm the signals to be associated to either the epicenter, the rupture process at the surface  
 245 or the ground shaking of topographic features on the island of Sulawesi. ~~Crosswinds, as shown in figure~~  
 246 ~~S2 of the supplement, lead to certain back-azimuth deviations.~~ An azimuthal sweep is observed in the  
 247 I07AU data from south to north (directions of 316° to 323°), consistent with the north-to-south rupture  
 248 along 150 km. ~~Deviations from the expected backazimuth direction are largest in I39PW data (about~~  
 249 ~~±10°)~~. The other ~~three~~ stations only show weak or no such ~~variations~~~~sweeps~~. ~~See figure S3 of the~~  
 250 ~~supplement for a detailed representation of these findings using absolute backazimuth values.~~

251 –For the more distant stations I40PG and I30JP, the epicentral infrasound is consistent with the  
 252 theoretical back-azimuths (1° and 4° deviation), but mostly allocated with frequencies below 0.1 Hz,  
 253 indicating larger absorption of the high-frequencies along the long-distance propagation (see section  
 254 4 for the corresponding propagation modeling). The high-frequency pulses in the I40PG recordings  
 255 around 12:40 UTC are associated to a ~~secondary~~~~seismoacoustic~~ signal, which is discussed in the end  
 256 of this section.

257 –In general, the observed back-azimuths fit very well to the theoretical ones calculated for the  
 258 epicenter for all four stations, allowing the application of a cumulative back~~tracking~~ ~~projection~~  
 259 method to locate the source regions of the observed infrasonic signals in section 5. The epicentral  
 260 signals’ mean apparent velocities are all in the acoustic range valid for stratospheric propagation (350  
 261 to 380 m/s, see table 1), with the exception of I30JP having higher mean apparent velocities of 436  
 262 m/s. This together with low celerity values of 263 m/s and appearance of only low-frequency signals  
 263 at this station strongly indicates thermospheric propagation for I30JP instead of stratospheric.

264 Thermospheric arrivals are expected to also be present in the other stations' observations apart from  
265 the dominant stratospheric ones; their later arrival time and lack of high-frequency content  
266 correspond to the long-lasting signal families following the main signal peak for many minutes in the  
267 low frequencies. These signal families can be observed together with low-frequency seismic wave  
268 activity and low frequency acoustic components from the stratospheric ducting in frequency bands  
269 around 0.1 Hz. They are discernible only to a certain degree by the apparent velocities and arrival  
270 times, being the slowest and latest arrivals from the epicenter. The celerities observed at I39PW, I07AU  
271 and I40PG as well as the observed arrival times and signal durations well correspond to the expected  
272 arrival times calculated using a 300 m/s celerity of average stratospheric propagation, quite close to  
273 the actually observed values at I39PW, I07AU and I40PG (see table 1). The expected arrival times for  
274 these stations are clearly within the main signals' observed time window and are only 2 to 6 minutes  
275 shifted from the respective mid-point of the observed arrivals' time window (arrival time plus half of  
276 the signal duration).

277 ~~—Microbaroms, which are infrasonic signals from interacting ocean surface waves (Donn and Naini,~~  
278 ~~1973; Arduin and Herbers, 2013)~~ are also present in the recordings of I39PW and I07AU around 0.2  
279 Hz and dominant before and after the earthquake signals, as well as surf or potentially anthropogenic  
280 noise in I40PG and I30JP data around 1 Hz during the complete observation. These background (noise)  
281 signals can clearly be separated, by back-azimuths (greenish colors in the top frame plots) from the  
282 epicentral signal. ~~Infrasound signals can generally be distinguished from the seismic arrivals by their~~  
283 ~~signal speed.~~

284 ~~—Secondary Seismoacoustic~~ signals are identified in I07AU, I39PW and I40PG data, coming from nearly  
285 epicentral directions and having acoustic apparent velocities. They have high frequency content (above  
286 1 Hz) and celerities below 200 or above 380 m/s, thus excluding purely acoustic waves propagating  
287 from the epicenter at the time of the rupture, e.g. also those traveling through thermosphere or  
288 troposphere. These arrivals signals could be seismoacoustic ~~arrivals precursors and successors~~ related  
289 to the earthquake (their signal parameters are provided in table 1 and highlighted in figure 2 with the  
290 label "SA"). A conversion of seismic to acoustic waves at certain, distinct terrain features might be  
291 responsible for this kind of signals. Islands between Java and East Timor (south of Sulawesi) could be  
292 the rough source region of the I07AU and I39PW signals, while islands of North Maluku (east of  
293 Sulawesi) may be the source of the seismoacoustic signals in I40PG. Further details on back-  
294 ~~tracking~~ projecting and thus identifying acoustic source regions are provided in section 5. Nevertheless,  
295 from the given observations it is not possible to certainly confirm these ~~secondary~~ signal locations as  
296 seismoacoustic source regions. None of the ~~secondary~~ signatures are observed at more than one  
297 station and smaller groups of signals come from all regions around Sulawesi, also including neighboring  
298 islands like Borneo. These signals are not necessarily associated to the earthquake, they could also  
299 originate from other local infrasound or ambient noise sources and are just coincidental to the  
300 earthquake in direction and timing. Alternatively, they and could be due to uncertainties in the array  
301 processing or back ~~tracking~~ projection methods. ~~or they are associated to other local infrasound or~~  
302 ~~other noise sources and are just coincidental to the earthquake in direction and timing.~~

303

#### 304 4. Modeling Results

305 ~~Attenuation and propagation modeling~~ Transmission loss calculations using firstly a semi-empirical  
306 method for a horizontal representation (map view, figure 3) and secondly a parabolic-equation-based  
307 propagation model for a vertical representation (cross section, figure 4) are performed in this section  
308 to confirm and interpret the observed epicentral infrasound signatures as described above.  
309 ~~Attenuation modeling~~ The semi-empirical method is used to estimate the frequency-dependent

310 transmission loss of a signal reaching the different infrasound stations, thereby characterizing its  
 311 detectability. Propagation modeling is necessary to identify observed and expected signal arrivals, and  
 312 to associate them to the prevailing atmospheric conditions between source and receivers and the  
 313 corresponding ducting behavior.

314 ~~Figure 3 shows~~ The quantification of infrasonic transmission loss ~~is shown in figure 3 using the semi-~~  
 315 ~~empirical method from atmospheric attenuation calculations~~ (see *Tailped et al., 2017*) as well as a  
 316 ~~representation~~ quantifying of the stratospheric wind field in terms of intensity and directionality.  
 317 Simulations are performed within an  $80^\circ \times 80^\circ$  area using  $0.5^\circ \times 0.5^\circ$  spatial resolution around the  
 318 earthquake epicenter for source frequencies of 0.2 Hz and 3 Hz. ~~At the low frequency of 0.2 Hz (figure~~  
 319 ~~3a), where most of the acoustic energy is concentrated following calculations with the INFERNO~~  
 320 ~~software (see Garces, 2013), the attenuation at all nearby infrasound stations is quite similar: values~~  
 321 ~~in the map and their uncertainties are  $66.8 \pm 4.4$  dB for I07AU,  $67.3 \pm 4.4$  dB for I39PW,  $69.0 \pm 4.3$  dB~~  
 322 ~~for I40PG and  $69.3 \pm 4.3$  dB for SING. Most of the acoustic energy is concentrated at the low frequency~~  
 323 ~~band of 0.2 Hz. This was calculated applying the “The Infrasonic Energy, Nth Octave” (INFERNO)~~  
 324 ~~algorithm (see Garces, 2013) to the station data. It calculates acoustic energy with frequency bands~~  
 325 ~~based on the ANSI and ISO standards for noise characterization for the acoustic range extended into~~  
 326 ~~the infrasound range, and it is based on fractional octave bands. An example is shown in figure S1 of~~  
 327 ~~the supplement. Within this band the transmission loss calculated is similar for the closer stations SING,~~  
 328 ~~I39PW, I07AU and I40PG (see figure 3a) and their values are between 66 dB and 70 dB with~~  
 329 ~~uncertainties of about 4 dB (see table 2). While values at these four stations indicate a northwest-to-~~  
 330 ~~southeast corridor of signal amplitudes in the same order of magnitude, the other stations in~~  
 331 ~~northeastern and southwestern directions have slightly higher ~~attenuation-transmission loss~~ values~~  
 332 ~~of between-  $73.7 \pm 4.2$  dB for I06AU,  $77.3 \pm 3.8$  for I04AU and  $79$  dB (see table 2)  $78.2 \pm 4.0$  for I30JP,~~  
 333 ~~indicating less favorable ducting conditions and detection probabilities at these stations.~~

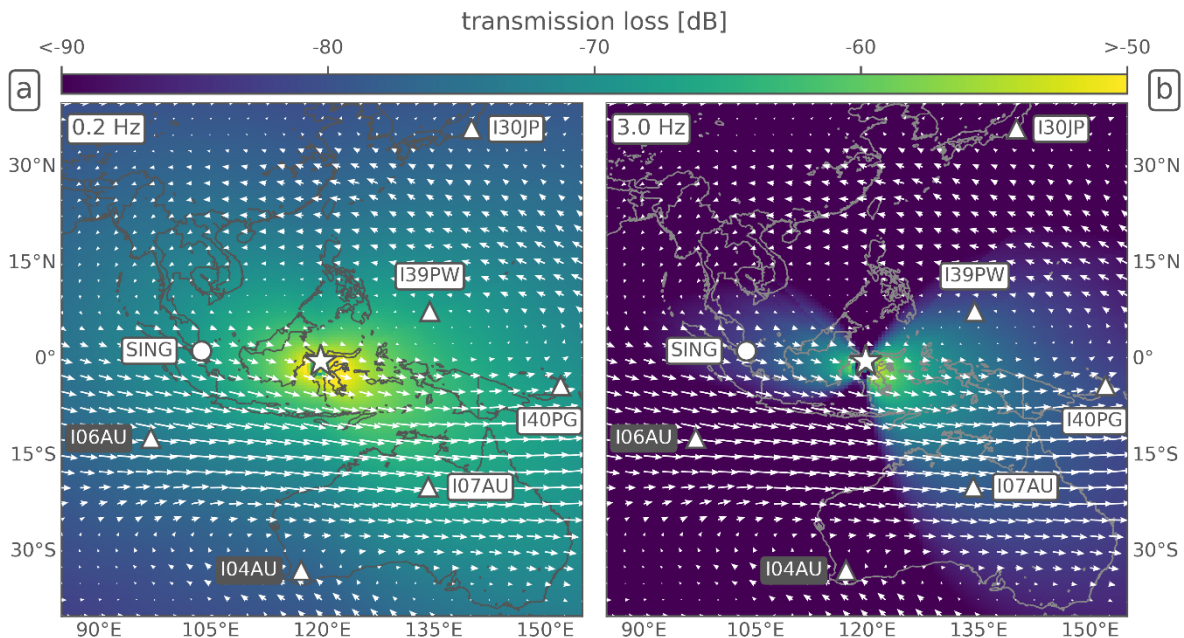

334  
 335 ~~Fig 3: Attenuation-m~~Map quantifying the acoustic ~~pressure-transmission~~ loss in dB (color-coded),  
 336 calculated for (a) 0.2 Hz and (b) 3 Hz source frequencies on a  $0.5^\circ \times 0.5^\circ$  grid. Arrows show direction  
 337 and intensity of the stratospheric wind field averaged between 30 and 60 km altitude for the 28<sup>th</sup> of  
 338 September 2018. The largest arrows represent a value of 25 m/s. For figure symbols and station labels  
 339 see figure 1.



341 Table 2: Summary of transmission loss values and uncertainties (in dB), derived for all stations within  
 342 this study from the frequency-dependent, semi-empirical method, as shown in figure 3.

|               | <u>SING</u>       | <u>I39PW</u>      | <u>I07AU</u>      | <u>I40PG</u>      | <u>I30JP</u>      | <u>I06AU</u>      | <u>I04AU</u>      |
|---------------|-------------------|-------------------|-------------------|-------------------|-------------------|-------------------|-------------------|
| <u>0.2 Hz</u> | <u>69.3 ± 4.3</u> | <u>67.3 ± 4.4</u> | <u>66.8 ± 4.4</u> | <u>69.0 ± 4.3</u> | <u>78.2 ± 4.0</u> | <u>73.7 ± 4.2</u> | <u>77.3 ± 3.8</u> |
| <u>3.0 Hz</u> | <u>84.1±24.2</u>  | <u>79.7±21.4</u>  | <u>78.3±17.9</u>  | <u>81.0±13.7</u>  | <u>107.0±32.1</u> | <u>101.4±26.6</u> | <u>118.7±34.9</u> |

343  
 344 The similarity of the ~~attenuation-transmission loss~~ values is consistent with the fact that low frequency  
 345 signals are less affected by propagation effects along the path. Drawing the same picture with a source  
 346 frequency of 3 Hz (figure 3b) indicates a different situation: station values for SING, I39PW, I07AU and  
 347 I40PG now are between 78.3 ± 17.9 dB for I07AU, 79.7 ± 21.4 dB for I39PW, 81.0 ± 13.7 dB for I40PG  
 348 and 84.1 ± 24.2 and 85 dB for SING with uncertainties of 13 to 25 dB (see table 2). These values are  
 349 still quite similar to the ones estimated for 0.2 Hz, along the abovementioned corridor, although the  
 350 uncertainties for the calculation are increased. The ~~attenuation-transmission loss~~ calculated from the  
 351 epicentral source into all directions to a stronger degree visualizes for the high frequencies a focal  
 352 effect in eastern and western directions with better observation conditions, while having regions with  
 353 increased transmission loss attenuation regions and thus more unfavorable detection conditions in  
 354 northern and southern directions. The ~~other~~ stations' values in these northern and southern directions  
 355 are between 101.4 ± 26.6 dB for I06AU, 118.7 ± 34.9 for I04AU and 119 dB 107.0 ± 32.1 for I30JP with  
 356 uncertainties of 26 to 35 dB, indicating remarkably higher ~~transmission lossattenuation~~ for these three  
 357 stations due to propagation effects and atmospheric conditions and explaining, why no high-frequency  
 358 signals (or signals at all) are observed at the respective stations.

359 Stratospheric wind conditions affect the propagation especially for the higher frequencies and point  
 360 out the general possibility and effectiveness of a stratospheric duct. This is consistent with the fact that  
 361 high frequency signals are more sensitive to the atmospheric conditions along the propagation path,  
 362 also explaining the higher uncertainties in the calculation of these values. The stratospheric wind fields  
 363 shown in figure 3 support this sensitivity by estimating the direction of the dominant stratospheric  
 364 wind regime, which is eastward on the southern hemisphere's low latitudes, and the intensity of this  
 365 30 to 60 km average, which is up to values of 25 m/s. Strong tailwinds thus support the stratospheric  
 366 propagation to I07AU, while strong head- and crosswinds hamper it towards I04AU and I06AU. Winds  
 367 are weaker from the source towards the other stations, mostly due to the equatorial wind situation of  
 368 zonal stratospheric winds changing their direction here, rendering possible the simultaneous  
 369 propagation in western (SING), eastern (I39PW and I40PG) and to a certain degree probably even  
 370 northeastern directions (I30JP).

371 The given ~~attenuation-transmission loss~~ modeling provides a map-based estimation at surface level  
 372 where stratospheric conditions are favorable or unfavorable for infrasound ducting. Complementary  
 373 to this, range-dependent propagation modeling is conducted between the epicenter and the four  
 374 signal-detecting IMS arrays to estimate the loss of signal amplitude due to atmospheric attenuation as  
 375 well as geometric spreading over the considerably large propagation distances of 1800 to 4500 km.  
 376 This is performed to estimate if stratospheric propagation is possible, even under weak ducting  
 377 conditions or conditions changing with distance.

378 Figure 4 shows tThe atmospheric ducting conditions and corresponding infrasound propagation for the  
 379 are shown in figure 4. For I39PW, I07AU and I40PG, stratospheric ducting is modeled in  
 380 good agreement with the observed mean celerities of 290, 304 and 309 m/s (see table 1). Following  
 381 *Negraru et al. (2010)*, celerities for stratospheric ducting are expected to be in the order of 280 m/s to  
 382 320 m/s. Corresponding ray-tracing calculations (not shown here) estimate the celerities of those  
 383 stratospheric ducts to be in the order of 290 between 287 m/s and 293 m/s.



384 For I30JP, stratospheric ducting ceases along the 4500 km propagation path due to more unstable  
 385 ducting conditions and higher transmission loss (about 150 dB). This is also in good agreement with  
 386 the observations, since only a low-frequency signal is recorded at I30JP with a low celerity value of 263  
 387 m/s (ray-tracing suggesting 244 m/s), indicative not of a stratospheric but of a thermospheric arrival.

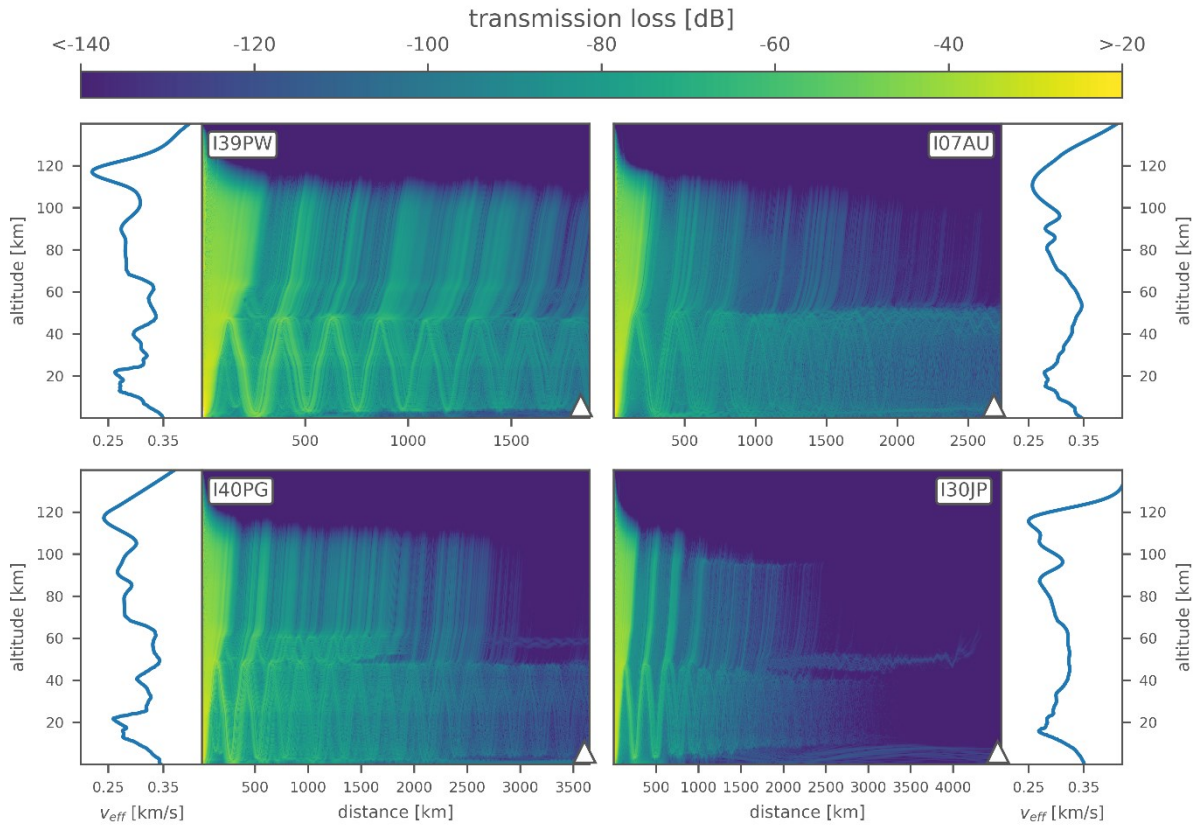

388  
 389 *Fig 4: Propagation modeling between the Sulawesi earthquake epicenter (plot origins at 0 km distance)*  
 390 *and the infrasound arrays I39PW, I07AU, I40PG and I30JP (respective triangles)*  
 391 *using a range-dependent parabolic equation method, quantifying the transmission loss ~~by atmospheric attenuation~~*  
 392 *in dB relative to 1 km for a frequency of 1 Hz. ~~An averaged Corresponding~~ effective sound speed profiles*  
 393 *( ~~$v_{eff}$~~ ) ~~are averaged over the complete propagation path~~ is shown for each station.*

394  
 395 Thermospheric ducts do not show up in figure 4, since this figure represents a 1 Hz modeling case  
 396 highlighting the medium and high frequency stratospheric ducting and resulting in stronger absorption  
 397 of thermospheric effects. For lower frequencies in the order of 0.01 Hz to 0.1 Hz, thermospheric  
 398 attenuation is considerably small (*Sutherland and Bass, 2004*) and acoustic signal energy can propagate  
 399 in the thermospheric duct over large distances with limited transmission loss.

400 ~~The availability of atmospheric ducts can be quantified using. The stability of the ducting conditions are~~  
 401 ~~best expressed by quantifying~~ the effective sound speed ( $v_{eff}$ ) ratio between the stratospheric  
 402 maximum (at 40-60 km) and the ground along the propagation path. This parameter indicates  
 403 favorable ducting conditions, when being equal or larger than 1 and unfavorable conditions otherwise.  
 404 Nevertheless, *Le Pichon et al., 2012* and *Landès et al, 2014* point out that also  $v_{eff}$  ratios above 0.9 along  
 405 the complete propagation path may lead to at least partially refracted energy in the stratosphere;  
 406 whereas this ducting becomes highly likely for values above 0.95. While classical ray-trace modeling  
 407 makes a strict separation between ratios larger or smaller than 1 (leading to existing or non-existing

408 stratospheric ducts), the parabolic equation modeling used here also takes into account partial  
409 refractions of acoustic energy at effective sound speed ratios near but below 1. ~~This is also a good~~  
410 ~~representation of. These partial refractions correspond to~~ small-scale structures like atmospheric  
411 gravity waves, ~~which vary~~ing the atmospheric temperature and winds and thus also influencing the  
412 infrasound propagation (Kulichkov et al., 2010; Green et al., 2011).

413 The  $v_{\text{eff}}$  ratios of the average profiles depicted in figure 4 are 0.96 (I39PW), 1.00 (I07AU), 0.99 (I40PG)  
414 and 0.93 (I30JP), fully supporting the reasoning above. Not shown in figure 4 are the propagation cases  
415 to I06AU and I04AU, having no observations of the event and accordingly low  $v_{\text{eff}}$  ratios of 0.92 and  
416 0.93, while the propagation to the single element station SING is indicative of stratospheric ducting  
417 with a higher  $v_{\text{eff}}$  ratio of 0.98.

418

## 419 5. Discussion and Conclusions

420 The main focus of the discussion of observed and modeled signals from the 28<sup>th</sup> September 2018  
421 Sulawesi earthquake is on the source regions and source mechanisms responsible for ~~it~~them. To  
422 support this discussion, a ~~back-tracking~~back projection procedure (comparable to the one applied in  
423 Shani-Kadmiel et al., 2017 and in the supplement to Gaebler et al., 2019) is applied using the observed  
424 PMCC pixels and ~~back-tracking~~projecting them using their temporal and directional information.

425 ~~Figure 5 shows t~~The back\_-projection results towards the island of Sulawesi ~~are presented in figure 5~~  
426 in terms of an event density map of the pixel-by-pixel information on their most likely origin locations.  
427 A total number of about 107,000 pixels is used to derive the picture, ~~combining the back projections~~  
428 ~~of all four stations' PMCC recordings towards the epicenter  $\pm 40^\circ$  maximum deviation. Single station~~  
429 ~~back projections can be found in the supplementary figure S4.~~ Seismic speeds of 4 km/s, resembling  
430 the primary propagation of crustal seismic waves, are combined with 0.3 km/s acoustic celerities  
431 representing an average value of the station observations. ~~The u~~Uncertainties ~~to the back-projected~~  
432 ~~locations as seen by extended contour regions in figure 5 are due to a number of potential influence~~  
433 ~~factors. The choice of a fixed seismic speed and fixed acoustic celerity for all pixels instead of individual~~  
434 ~~values is supposed to introduce location deviations. of the m~~Measurements and analyses of back-  
435 ~~azimuth directions may contain uncertainties due to array configurations and due to crosswind~~  
436 ~~influences on the infrasound propagation. as well as the choice of a fixed seismic speed and acoustic~~  
437 ~~celerity for all pixels instead of individual values is supposed to introduce an uncertainty to the back-~~  
438 ~~projected locations as seen by the extended contour regions in figure 5. The method does not account~~  
439 ~~for atmospheric variability (as does the forward propagation approach of figure 4), introducing certain~~  
440 ~~location biases.~~ The velocity-averaged back\_-projection nevertheless sufficiently emphasizes the major  
441 source regions and infrasound generation mechanisms.

442 A region to the south of the epicenter is highlighted (yellow colors representing the highest event  
443 density), well corresponding with the earthquake rupture zone along the Palu-Koro fault line. Up to a  
444 certain degree, this method also serves as a cross-bearing location procedure, although stations  
445 contributing to it are not equally weighted but weighted by the number of pixels used from the  
446 respective stations (in this picture, I07AU dominates the back\_-projection, since it has the longest and  
447 largest record of the event, ~~also see figure S4~~); The location of the highest event density is at 119.6° E,  
448 1.0° S, approximately 80 km south of the epicenter and thus half-way along the rupture.

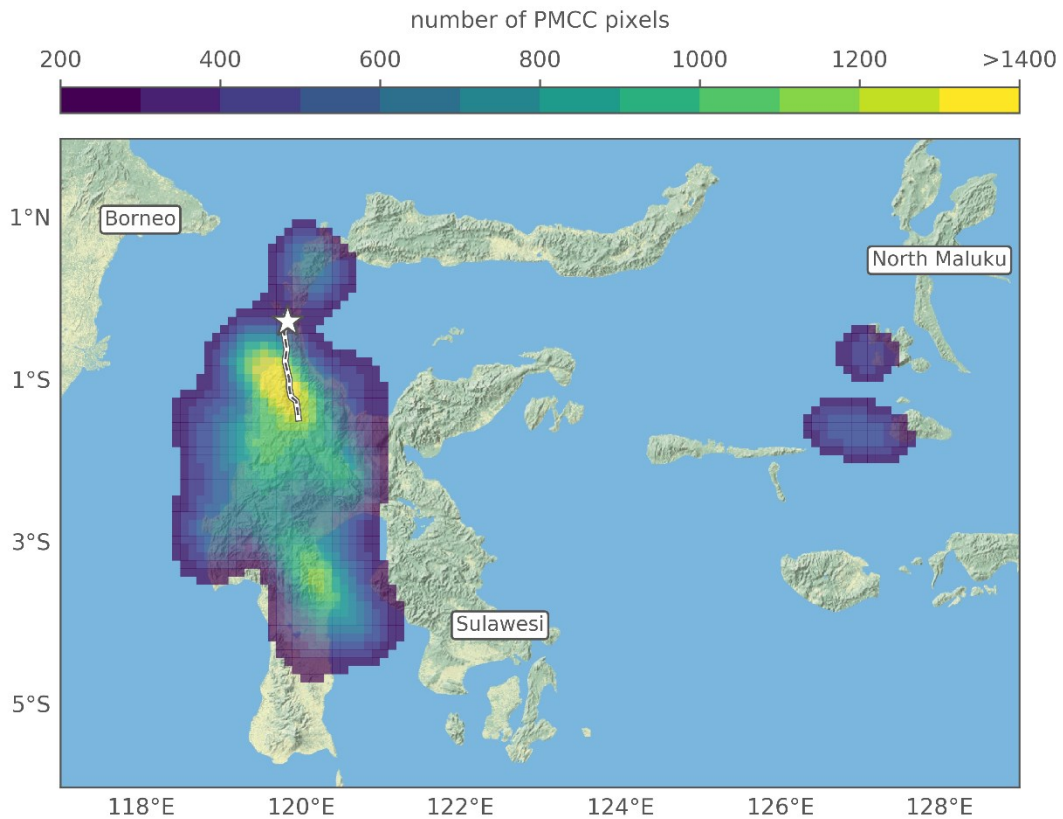

449

450 *Fig 5: Back projection of the combined PMCC detections from I39PW, I07AU, I40PG and I30JP.*  
 451 *Considered is each PMCC pixel's back-azimuth as well as a combination of 4 km/s seismic and 0.3 km/s*  
 452 *acoustic celerities, resulting in seismic-to-acoustic conversion locations. Color-coded event density for*  
 453 *these locations is shown on a 0.1° x 0.1° grid, highlighting regions with more than 200 back-projected*  
 454 *pixels per grid node. The epicenter is marked by an asterisk, the rupture zone traced by a dashed line.*

455

456 The figure highlights that infrasound is radiated not only from a distinct, epicentral point source alone,  
 457 but from a region extended in north-south directions following the rupture (in fact the event density  
 458 values at the epicenter itself are lower than those in the surrounding regions). Secondary peaks apart  
 459 from the basin region around the rupture are identified north of the epicenter and in the southern part  
 460 of Sulawesi island. The pixels of this southern secondary color peak are mostly related to the early  
 461 parts of the main signal recorded at I07AU, while the central and northern color peaks in the figure are  
 462 related to signals arriving some minutes later. This corresponds to the 316° to 323° sweep in I07AU  
 463 data from south to north, as described in section 3. The two side-maxima separated from the main  
 464 signal's colored region are related to the secondary, seismoacoustic signatures described in section 3.  
 465 They are derived from a number of I40PG PMCC pixels and point to a region near the North Maluku  
 466 islands east of Sulawesi (also see figure S4). Other secondary-side-maxima as e.g. the ones between  
 467 Java and east Timor, also mentioned in section 3, are beyond the map borders and not shown here,  
 468 but can be found in figure S4.

469 In general, the results observed and visualized by figure 5 point out that an enlarged region, closely  
 470 following the rupture and thus also the topography along the fault, generates the acoustic signals  
 471 recorded at the remote infrasound sensors. This includes the rupture region itself suffering most from  
 472 the earthquake-related ground motionmovement (offsets of up to 7 m horizontal and 2 m dip slip) as  
 473 well as an extended basin area around the rupture, enclosed by mountain chains in mostly north-to-  
 474 south directions. Mountainous areas are a well-known source of secondary infrasound and

475 seismoacoustic signatures (e.g. *Arrowsmith et al., 2010*), and correspond to the event density maxima  
 476 in figure 5: the mountain chains west and east of the Palu-Koro fault as well as the mountain area in  
 477 the south of the island with the highest mountains of the Sulawesi island (Mt. Rantemario and Mt.  
 478 Rantekombola, both about 3500 m elevation) generate large portions of the recorded signals. The less  
 479 prominent but recognizable regions north of the epicenter (Mt. Fuyul Sojol, 3000 m elevation) and on  
 480 the Maluku islands (e.g. Mt. Buku Sibela, 2000 m elevation) are also related to topographic peaks. The  
 481 most likely source mechanism for the generation of large parts of the **infrasonic and** seismoacoustic  
 482 signals is therefore estimated to be the shaking of elevated or exposed topography **near the rupture**  
 483 **zone**, stimulated by crustal seismic or surface waves reaching these areas and turning them into  
 484 motion.

485 To qualitatively assess if the super shear nature of the given earthquake or the regional prerequisites  
 486 (or both) are responsible for the intense and long-lasting infrasound signals observed, the 28<sup>th</sup>  
 487 September 2018 Sulawesi earthquake is compared to three other super shear earthquakes as well as  
 488 three other normal shear earthquakes from the same region (Indonesia and Papua New Guinea).  
 489 Shallow events between 5 - 30 km depth were chosen with comparably strong magnitudes of Mw >6.5  
 490 so that infrasound generation and detection can be expected. Table 23 chronologically lists these six  
 491 events and provides an estimation of the emitted and observed infrasound for all of them.

492

493 *Table 23: List of events similar to the 28<sup>th</sup> September 2018 Sulawesi earthquake, either in their super*  
 494 *shear nature or in their regional origin. The separation between “Event detection” / “No Event*  
 495 *Detection” “detecting IMS stations” (not necessary a complete list) as well the “source type / signal*  
 496 *evaluation” are is an estimations following data analyses performed by authors of this study.*

| <b>Event</b>                                                               | <b>Detecting-IMS stations</b> | <b>Source type / signal evaluation</b>                                                                                                                                                                 |
|----------------------------------------------------------------------------|-------------------------------|--------------------------------------------------------------------------------------------------------------------------------------------------------------------------------------------------------|
| <b>Denali</b> , Alaska/USA,<br>03.11.2002,<br>Mw 7.9, depth 4.9 km         | I53US, I10CA                  | <b>Super shear earthquake</b> ,<br>short duration (10 minutes), strong infrasound at<br>I53US (nearby), weak infrasound at I10CA (remote)<br>generated by topography, also seismic arrivals            |
| <b>Sumatra-Andaman</b> ,<br>Indonesia, 26.12.2004,<br>Mw 9.3, depth 30 km  | I52GB, (others)               | <b>Same region, normal shear earthquake</b> ,<br>long duration (30 minutes), strong infrasound,<br>also seismic arrivals and secondary sources related<br>to tsunami and tsunami shoreline interaction |
| <b>Quinghai</b> , China,<br>13.04.2010,<br>Mw 6.9, depth 17 km             | I34MN                         | <b>Super shear earthquake</b> ,<br>short duration (<10 minutes), weak infrasound,<br>no signal at stations in Japan or Russia,<br>no seismic arrivals                                                  |
| <b>Craig</b> , Alaska/USA,<br>05.01.2013,<br>Mw 7.5, depth 10 km           | I53US, (I56US)                | <b>Super shear earthquake</b> ,<br>short duration (<10 minutes), weak infrasound,<br>I56US signals probably from other source,<br>also seismic arrivals                                                |
| <b>Porgera</b> , Papua New<br>Guinea, 25.02.2018,<br>Mw 7.5, depth 25.2 km | I06AU, I07AU,<br>I39PW, I40PG | <b>Same region, normal shear earthquake</b> ,<br>long duration (20-60 minutes), strong infrasound<br>related to nearby topography,<br>also seismic arrivals                                            |
| <b>Kokopo</b> , Papua New<br>Guinea, 14.05.2019,<br>Mw 7.5, depth 10 km    | I22FR, I39PW,<br>I40PG        | <b>Same region, normal shear earthquake</b> ,<br>long duration (10-60 minutes), strong infrasound<br>related to nearby topography,<br>also seismic arrivals                                            |

| <u>Event</u><br><br>(with location, time, magnitude, depth)         | <u>Source type</u>                          | <u>Available IMS stations up to 5000 km distance</u>                                                                                                                   |                                                                                                                                |
|---------------------------------------------------------------------|---------------------------------------------|------------------------------------------------------------------------------------------------------------------------------------------------------------------------|--------------------------------------------------------------------------------------------------------------------------------|
|                                                                     |                                             | <u>Event Detection</u><br>(with distance and PMCC-estimated signal duration)                                                                                           | <u>No Event Detection</u><br>(with distance)                                                                                   |
| <u>Denali, Alaska/USA, 03.11.2002, Mw 7.9, depth 4.9 km</u>         | <u>Super shear earthquake</u>               | <u>I53US (156 km, 10 min)</u><br><u>I10CA (3358 km, 30 min)</u>                                                                                                        | <u>I59US (4919 km)</u>                                                                                                         |
| <u>Sumatra Andaman, Indonesia, 26.12.2004, Mw 9.3, depth 30 km</u>  | <u>Same region, normal shear earthquake</u> | <u>I52GB (2852 km, 30 min)</u>                                                                                                                                         | <u>I07AU (4930 km)</u>                                                                                                         |
| <u>Quinghai, China, 13.04.2010, Mw 6.9, depth 17 km</u>             | <u>Super shear earthquake</u>               | <u>I34MN (1810 km, 10 min)</u>                                                                                                                                         | <u>I46RU (2480 km)</u><br><u>I45RU (3273 km)</u><br><u>I31KZ (3669 km)</u><br><u>I30JP (3996 km)</u><br><u>I39PW (4831 km)</u> |
| <u>Craig, Alaska/USA, 05.01.2013, Mw 7.5, depth 10 km</u>           | <u>Super shear earthquake</u>               | <u>I53US (1294 km, 5 min)</u><br><u>I56US (1443 km, 10 min)</u>                                                                                                        | <u>I10CA (2647 km)</u><br><u>I57US (2795 km)</u><br><u>I18DK (3509 km)</u><br><u>I44RU (4236 km)</u><br><u>I59US (4334 km)</u> |
| <u>Porgera, Papua New Guinea, 25.02.2018, Mw 7.5, depth 25.2 km</u> | <u>Same region, normal shear earthquake</u> | <u>I40PG (1044 km, 60 min)</u><br><u>I39PW (1759 km, 45 min)</u><br><u>I07AU (1784 km, 45 min)</u><br><u>I60US (3835 km, 45 min)</u><br><u>I04AU (4164 km, 15 min)</u> | <u>I22FR (3144 km)</u><br><u>I05AU (4064 km)</u><br><u>I30JP (4587 km)</u>                                                     |
| <u>Kokopo, Papua New Guinea, 14.05.2019, Mw 7.5, depth 10 km</u>    | <u>Same region, normal shear earthquake</u> | <u>I40PG (72 km, 10 min)</u><br><u>I39PW (2379 km, 30 min)</u><br><u>I22FR (2527 km, 10 min)</u>                                                                       | <u>I07AU (2649 km)</u><br><u>I60US (3004 km)</u><br><u>I05AU (4286 km)</u><br><u>I30JP (4542 km)</u><br><u>I58US (4803 km)</u> |

497

498 The three super shear earthquakes named after ~~Mount the~~ Denali fault, the Quinghai province and the  
499 city of Craig, occurring in 2002, 2010 and 2013, are the earthquakes most recent, most intense and  
500 most similar in their super shear characteristics to the 28<sup>th</sup> September 2018 Sulawesi earthquake, also  
501 having super shear rupture velocities of 4 to 6 km/s (see Dunham and Archuleta, 2004; Wang and Mori,  
502 2012; Yue et al., 2013). Although the IMS infrasound network is not fully established yet (to the time  
503 of the Sulawesi earthquake, 80% of the stations were certified and operational, while it were only 8%  
504 to the time of the Denali earthquake and about 70% during the time of the other two earthquakes), at  
505 least one infrasound array was able to unambiguously detect and characterize each of the mentioned  
506 earthquakes.



507 The infrasound signals for Denali earthquake indicate ~~strong infrasound signals~~ a high signal-to-noise  
508 ratio at the nearby I53US station as well as a much weaker signals at I10CA in a much larger distance.  
509 This event was a good opportunity to track the infrasound back to its generation region in the Alaska  
510 Mountain Range along the Denali fault where the rupture occurred (observed in I53US data, *Olsen et*  
511 *al., 2003*) and to the Rocky Mountain Chain south-east of it (observed in I10CA data), where similar  
512 observations were made for the 1964 Great Alaskan earthquake (see Young and Greene, 1982). The  
513 strong movement of local and remote topography generated the infrasound in good agreement with  
514 the Sulawesi case. However, no indication is given that the super shear characteristics of the Denali  
515 earthquake specially favors the generation of infrasound. For the Quinghai and Craig earthquakes, also  
516 reported to be super shear, much weaker and shorter duration infrasound is observed at stations in  
517 distances of 1400 km (I53US to Craig) to 1800 km (I34MN to Quinghai), compared to Sulawesi where  
518 stronger and much longer infrasound signals were observed between 1800 km and 4500 km. Again,  
519 these do not indicate any connection between those previous super shear earthquakes and  
520 extraordinary infrasound generation.

521 The Sulawesi earthquake is also compared to three strong earthquakes within the same region, most  
522 prominently two nearby Papua New Guinea earthquakes (near the Porgera mine, 2018 and Kokopo  
523 city, 2019) of the same magnitude occurring half a year before and after the Sulawesi one, showing  
524 ~~strong and~~ clearly observed infrasound signals with high signal-to-noise ratios at multiple IMS stations  
525 as well. These infrasound signals are observed up to similar distances as in the Sulawesi case and also  
526 provide long-duration, strong amplitude wave energy associated to infrasonic and seismoacoustic  
527 arrivals coming from the two earthquakes. Clear seismic signals are also present in the recordings (as  
528 in most cases described before, apart from Quinghai) and an association to topographic features as  
529 infrasound source regions is possible (the mountain chain in central Papua New Guinea for Porgera  
530 and the mountain areas in New Britain and New Ireland for Kokopo). For the Sumatra Andaman  
531 earthquake of 2004, strong infrasound with long signal durations was observed and could be back-  
532 ~~tracked~~ projected to topographic features of islands and shorelines, especially where the follow-up  
533 tsunami reached the shoreline of the Bay of Bengal (see *Le Pichon et al., 2005*). None of the presented  
534 earthquakes were super shear earthquakes, but all of them, especially the two very similar Papua New  
535 Guinea earthquakes generated strong infrasonic signals comparable to the signals of the Sulawesi  
536 event.

537 ~~This leads to the conclusion that from comparison with other events, It can be concluded from~~  
538 comparison with other events above that strong infrasound generated by an earthquake is not mainly  
539 or exclusively linked to the earthquake's super shear ~~characteristic~~ nature of an earthquake is the most  
540 prominent or even exclusive feature linked to strong infrasound generated by an earthquake, but most  
541 likely to the nearby existence of mountainous topography. This topography serves as a large-area  
542 resonating membrane in terms of large masses brought into motion by a triggering earthquake, ~~which~~  
543 ~~then~~ These mass movements produces large amounts of acoustic energy, which can be recorded at  
544 nearby or remote infrasound stations given conducive propagation conditions.

545 ~~Since~~ The given super shear event resembles one of only few large magnitude, shallow earthquakes  
546 generating pronounced infrasound, ~~it~~ it therefore provides a unique opportunity to study earthquake  
547 generated infrasound in terms of the source mechanisms, signal characteristics, propagation  
548 conditions and ducting behavior. It also supports the improved understanding of the process of  
549 ~~stimulating~~ infrasound radiation by mountain shaking from large earthquakes and the conversion of  
550 seismic to acoustic energy.

551 ~~While this study provides the observation analyses and modeling results for the Sulawesi earthquake~~  
552 ~~and a qualitative comparison to other events, it cannot provide a comprehensive investigation taking~~

553 ~~into account every detail to utmost precision.~~ Measurement uncertainties within this study are due to  
554 the instrumentation and methods applied; modeling uncertainties are due to assumptions applied  
555 within the models and due to multi-scale atmospheric variations between source and receivers leading  
556 to uncertainties in the ~~attenuation transmission loss~~ and propagation calculations. Taking into account  
557 these uncertainties ~~and allows to improve~~ the methods and models to cope with ~~such them issues~~  
558 in the future. It will help to gain novel and enhanced insights about infrasound observations and  
559 modeling in general and earthquake generated infrasound in particular. This will also help to optimize  
560 seismoacoustic observation networks in terms of better understanding the instrumental needs and  
561 better evaluating the signatures observable by it. It will finally support seismoacoustic studies of  
562 natural as well as anthropogenic infrasound sources in the future and thereby support the infrasound  
563 monitoring for treaty verification purposes of the CTBT, as did other CTBT-related studies about  
564 infrasound observation, propagation and signal characterization (Assink et al., 2016; Bowman, 2019;  
565 Gaebler et al., 2019).

566

## 567 **Acknowledgements**

568 This work comprises Earth Observatory of Singapore contribution no. 249. This research is partly  
569 supported by the National Research Foundation Singapore and the Singapore Ministry of Education  
570 under the Research Centres of Excellence initiative.

571

## 572 **Data availability**

573 Information about earthquake magnitude, location and frequency of occurrence in the region of  
574 interest is retrieved from the online-accessible archive of the USGS, see  
575 <https://earthquake.usgs.gov/earthquakes/> (last accessed ~~23.02.09.05~~.2019).

576 Atmospheric wind and temperature profiles are derived from ~~the ECMWF~~ operational high-resolution  
577 atmospheric model analysis, defined by the Integrated Forecast System of the ECMWF, available at  
578 <https://www.ecmwf.int/> (last accessed ~~02.09.23.05~~.2019).

579 Waveform data for the infrasound arrays of the CTBTO IMS (<https://www.ctbto.org/>) used in this study  
580 are available to the authors being members of National Data Centers for the CTBTO. Waveform data  
581 for SING infrasound station are available to the authors being members of the Earth Observatory of  
582 Singapore.

583

## 584 **Competing Interests**

585 none

586

## 587 **Author Contributions**

588 **CP** analyzed the waveform data, performed the propagation modeling, wrote the manuscript text and  
589 coordinated the co-author contributions; **PG** compiled the data, generated the figures and helped with  
590 finalizing the manuscript layout; **LC** provided first ideas and initiated the collaborative study; **ALP**  
591 provided expertise in earthquake infrasound, comparison to other events and initiated the  
592 collaborative study; **JV** analyzed the waveform data and performed propagation modeling; **AP**  
593 analyzed the waveform data and provided manuscript text; **DT** performed the attenuation modeling

594 and provided manuscript text; **BT** provided first ideas and initiated the collaborative study; **all authors**  
595 supported and improved the draft by proof-reading, commenting or correcting the manuscript.

596

## 597 **References**

598 [Ardhuin, F. and Herbers, T.H.C.: Noise generation in the solid Earth, oceans and atmosphere, from](#)  
599 [nonlinear interacting surface gravity waves in finite depth, \*Journal of Fluid Mechanics\*, 716, doi:](#)  
600 [10.1017/jfm.2012.548, 2013.](#)

601 Arrowsmith, S.J., Johnson, J.B., Drob, D.P., and Hedlin, M.A.H.: The seismoacoustic wavefield: A new  
602 paradigm in studying geophysical phenomena, *Review of Geophysics*, 48, doi:  
603 10.1029/2010RG000335, 2010.

604 [Assink, J. D., Averbuch, G., Smets, P. S. M., and Evers, L. G.: On the infrasound detected from the 2013](#)  
605 [and 2016 DPRK's underground nuclear tests, \*Geophysical Research Letters\*, 43, doi:](#)  
606 [10.1002/2016GL068497, 2016.](#)

607 Bao, H., Ampuero, J.-P., Meng, L., Fielding, E.J., Liang, C., Milliner, C.W.D., Feng, T., and Huang, H.: Early  
608 and persistent supershear rupture of the 2018 magnitude 7.5 Palu earthquake, *Nature Geoscience*, 12,  
609 doi: 10.1038/s41561-018-0297-z, 2019.

610 [Bernard, P. and Baumont, D.: Shear Mach wave characterization for kinematic fault rupture models](#)  
611 [with constant supershear rupture velocity, \*Geophysical Journal International\*, 162 doi: 10.1111/j.1365-](#)  
612 [246X.2005.02611.x, 2005.](#)

613 Bouchon, M., Toksöz, N., Karabulut, H., Bouin, M.-P., Dietrich, M., Aktar, M., and Edie, M.: Seismic  
614 imaging of the 1999 Izmit (Turkey) Rupture inferred from the near-fault recordings, *Geophysical*  
615 *Research Letters*, 27, doi: 10.1029/2000GL011761, 2000.

616 Bouchon, M. and Vallée, M.: Observation of Long Supershear Rupture during the Magnitude 8.1  
617 Kunlunshan Earthquake, *Science*, 301, doi: 10.1126/science.1086832, 2003.

618 [Bowman, D. C.: Yield and emplacement depth effects on acoustic signals from buried explosions in](#)  
619 [hard rock, \*Bulletin of the Seismological Society of America\*, 109, doi: 10.1785/0120180285, 2019.](#)

620 Cansi, Y.: An automatic seismic event processing for detection and location: the PMCC method,  
621 *Geophysical Research Letters*, 22, doi: 10.1029/95GL00468, 1995.

622 [Doan, M.-L. and Gary, G., Rock pulverization at high strain rate near the San Andreas fault, \*Nature\*](#)  
623 [\*Geosciences\*, 2, doi: 10.1038/NGEO640, 2009.](#)

624 [Donn, W.L. and Naini, B.: Sea wave origin of microbaroms and microseisms, \*Journal of Geophysical\*](#)  
625 [\*Research\*, 78, doi: 10.1029/JC078i021p04482, 1973.](#)

626 Drob, D. P., Picone, J. M., and Garcés, M. A.: Global morphology of infrasound propagation, *Journal of*  
627 *Geophysical Research*, 108, doi: 10.1029/2002JD003307, 2003.

628 Drob, D. P., Emmert, J. T., Crowley, G., Picone, J. M., Shepherd, G. G., Skinner, W., Hays, P., Niciejewski,  
629 R. J., Larsen, M., She, C. Y., Meriwether, J. W., Hernandez, G., Jarvis, M. J., Sipler, D. P., Tepley, C. A.,  
630 O'Brien, M. S., Bowman, J. R., Wu, Q., Murayama, Y., Kawamura, S., Reid, I. M., and Vincent R. A.: An  
631 Empirical Model of the Earth's Horizontal Wind Fields: HWM07, *Journal of Geophysical Research*, 113,  
632 doi: 10.1029/2008JA013668, 2008.

633 Dunham, E.M. and Archuleta, R. J.: Evidence for a Supershear Transient during the 2002 Denali Fault  
634 Earthquake, *Bulletin of the Seismological Society of America*, 94, doi: 10.1785/0120040616, 2004.

635 Gaebler, P., Ceranna, L., Nooshiri, N., Barth, A., Cesca, S., Frei, M., Grünberg, I., Hartmann, G., Koch, K.,  
636 Pilger, C., Ross, J. O., and Dahm, T.: A multi-technology analysis of the 2017 North Korean nuclear test,  
637 *Solid Earth*, 10, doi: 10.5194/se-10-59-2019, 2019.

638 Garcés, M. A.: On Infrasound Standards, Part 1: Time, Frequency, and Energy Scaling, *InfraMatics* 2,  
639 doi: 10.4236/inframatics.2013.22002, 2013.

640 Gibbons, S. J., Asming, V., Eliasson, L., Fedorov, A., Fyen, J., Kero, J., Kozlovskaya, E., Kvaerna, T., Liszka,  
641 L., Näsholm, S. P., Raita, T., Roth, M., Tiira, T., and Vinogradov, Y.: The European Arctic: A Laboratory  
642 for Seismoacoustic Studies, *Seismological Research Letters*, 86, doi: 10.1785/0220140230, 2015a.

643 Gibbons, S. J., Kvaerna, T., and Mykkeltveit, S.: Could the IMS Infrasound Stations Support a Global  
644 Network of Small Aperture Seismic Arrays?, *Seismological Research Letters*, 86, doi:  
645 10.1785/0220150068, 2015b.

646 Green, D.N., Vergoz, J., Gibson, R., Le Pichon A., and Ceranna, L.: Infrasound radiated by the Gerdec  
647 and Chelopechene explosions: propagation along unexpected paths, *Geophysical Journal  
648 International*, 185, doi: 10.1111/j.1365-246X.2011.04975.x, 2011.

649 Hedlin, M.A.H., Walker, K. T., Drob, D. P., and de Groot-Hedlin, C. D.: Infrasound: Connecting the Solid  
650 Earth, Oceans, and Atmosphere, *Annual Review of Earth and Planetary Sciences*, 40, doi:  
651 10.1146/annurev-earth-042711-105508, 2012.

652 Heidarzadeh, M., Muhari, A., and Wijanarto, A.B.: Insights on the Source of the 28 September 2018  
653 Sulawesi Tsunami, Indonesia Based on Spectral Analyses and Numerical Simulations, *Pure and Applied  
654 Geophysics*, 176, doi: 10.1007/s00024-018-2065-9, 2019.

655 Hernandez, B., Le Pichon, A., Vergoz, J., Herry, P., Ceranna, L., Pilger, C., Marchetti, E., Ripepe, M., and  
656 Bossu, R.: Estimating the Ground-Motion Distribution of the 2016 Mw 6.2 Amatrice, Italy, Earthquake  
657 Using Remote Infrasound Observations, *Seismological Research Letters*, 89, doi: 10.1785/0220180103,  
658 2018.

659 [Jamelot, A., Gailler, A., Heinrich, P., Vallage, A., and Champenois, J.: Tsunami Simulations of the](#)  
660 [Sulawesi Mw 7.5 Event: Comparison of Seismic Sources Issued from a Tsunami Warning Context Versus](#)  
661 [Post-Event Finite Source, \*Pure and Applied Geophysics\*, 176, doi: 10.1007/s00024-019-02274-5, 2019.](#)

662 Katili, J. A.: Past and Present Geotectonic Position of Sulawesi, Indonesia, *Tectonophysics*, 45, doi:  
663 10.1016/0040-1951(78)90166-X, 1978.

664 Kulichkov, S.N., Chunchuzov, I. P., and Popov, O. I.: Simulating the Influence of an Atmospheric Fine  
665 Inhomogeneous Structure on Long Range Propagation of Pulsed Acoustic Signals, *Izvestiya  
666 Atmospheric and Oceanic Physics*, 46, doi: 10.1134/S0001433810010093, 2010.

667 Landès, M., Le Pichon, A., Shapiro, N.M., Hillers, G., and Campillo, M.: Explaining global patterns of  
668 microbarom observations with wave action models, *Geophysical Journal International*, 199, doi:  
669 10.1093/gji/ggu324, 2014.

670 Le Pichon, A., Guilbert, J., Vega, A., Garcés, M. A., and Brachet, N.: Ground-coupled air waves and  
671 diffracted infrasound from the Arequipa earthquake of June 23, 2001, *Geophysical Research Letters*,  
672 29, doi: 10.1029/2002GL015052, 2002.

673 Le Pichon, A., Guilbert, J., Vallée, M., Dessa, J. X., and Ulziibat, M.: Infrasonic imaging of the Kunlun  
674 Mountains for the great 2001 China earthquake, *Geophysical Research Letters*, 30, doi:  
675 10.1029/2003GL017581, 2003.

676 Le Pichon, A., Herry, P., Mialle, P., Vergoz, J., Brachet, N., Garces, M. A., Drob, D., and Ceranna, L.:  
677 Infrasonic associated with 2004-2005 large Sumatra earthquakes and tsunami, *Geophysical Research*  
678 *Letters*, 32, doi: 10.1029/2005GL023893, 2005.

679 Le Pichon, A., Mialle, P., Guilbert, J., and Vergoz, J.: Multistation infrasonic observations of the Chilean  
680 earthquake of 2005 June 13, *Geophysical Journal International*, 167, doi: 10.1111/j.1365-  
681 246X.2006.03190.x, 2006.

682 Le Pichon, A., Blanc, E., and Hauchecorne, A. (Eds.): *Infrasound Monitoring for Atmospheric Studies*,  
683 Springer, ISBN: 978-1-4020-9507-8, 2010.

684 Le Pichon, A., Ceranna, L., and Vergoz, J.: Incorporating numerical modeling into estimates of the  
685 detection capability of the IMS infrasonic network, *Journal of Geophysical Research*, 117, doi:  
686 10.1029/2011JD016670, 2012.

687 Le Pichon, A., Blanc, E., and Hauchecorne, A. (Eds.): *Infrasound for Atmospheric Studies – Challenges*  
688 *in Middle Atmosphere Dynamics and Societal Benefits*, Springer, ISBN: 978-3-319-75138-2, 2019.

689 Marchetti, E., Lacanna, G., Le Pichon, A., Piccinini, D., and Ripepe, M.: Evidence of large infrasonic  
690 radiation induced by earthquake interaction with alluvial sediments, *Seismological Research Letters*,  
691 87, doi: 10.1785/0220150223, 2016.

692 [Matoza, R., Green, D. N., Le Pichon, A., Shearer, P. M., Fee, D., Mialle, P., and Ceranna, L.: Automated](#)  
693 [detection and cataloging of global explosive volcanism using the International Monitoring System](#)  
694 [infrasound network, \*Journal of Geophysical Research Solid Earth\*, 122, doi: 10.1002/2016JB013356,](#)  
695 [2017.](#)

696 Mutschlecner, J. P. and Whitaker, R. W.: Infrasonic from earthquakes, *Journal of Geophysical*  
697 *Research*, 110, doi: 10.1029/2004JD005067, 2005.

698 Negru, P. T., Golden, P., and Herrin, E.T.: Infrasonic Propagation in the “Zone of Silence”,  
699 *Seismological Research Letters*, 81, doi: 10.1785/gssrl.81.4.615, 2010.

700 Olson, J.V., Wilson, C.R., and Hansen, R.A.: Infrasonic associated with the 2002 Denali fault  
701 earthquake, Alaska, *Geophysical Research Letters*, doi: 10.1029/2003GL018568, 2003.

702 Omira, R., Dogan, G. G., Hidayat, R., Husrin, S., Prasetya, G., Annunziato, A., Proietti, C., Probst, P.,  
703 Paparo, M. A., Wronna, M., Zaytsev, A., Pronin, P., Giniyatullin, A., Putra, P. S., Hartanto, D., Ginanjar,  
704 G., Kongko, W., Pelinovsky, E., and Yalciner, A. C.: The September 28th, 2018, Tsunami In Palu-Sulawesi,  
705 Indonesia: A Post-Event Field Survey, *Pure and Applied Geophysics* 176, doi: 10.1007/s00024-019-  
706 02145-z, 2019.

707 Pailoplee, S.: Probabilities of Earthquake Occurrences along the Sumatra-Andaman Subduction Zone,  
708 *Open Geosciences*, 9, doi: 10.1515/geo-2017-0004, 2017.

709 Picone, J. M., Hedin, A. E., Drob, D. P., and Aikin, A. C.: NRLMSISE-00 Empirical Model of the  
710 Atmosphere: Statistical Comparisons and Scientific Issues, *Journal of Geophysical Research*, 107, doi:  
711 10.1029/2002JA009430, 2002.

712 Pilger, C., Ceranna, L., Ross, J.O., Vergoz, J., Le Pichon, A., Brachet, N., Blanc, E., Kero, J., Liszka, L.,  
713 Gibbons, S., Kvaerna, T., Näsholm, S.P., Marchetti, E., Ripepe, M., Smets, P., Evers, L., Ghica, D., Ionescu,



- 714 C., Sindelarova, T., Ben Horin, Y., and P. Mialle: The European Infrasound Bulletin, Pure and Applied  
715 Geophysics, 175, doi: 10.1007/s00024-018-1900-3, 2018.
- 716 Shani-Kadmiel, S., Assink, J.D., Smets, P.S.M., and Evers, L.G.: Seismoacoustic coupled signals from  
717 earthquakes in Central Italy: epicentral and secondary sources of infrasound, Geophysical Research  
718 Letters, 45, doi: 10.1002/2017GL076125, 2017.
- 719 Socquet, A., Hollingsworth, J., Pathier, E., and Bouchon, M.: Evidence of supershear during the 2018  
720 magnitude 7.5 Palu earthquake from space geodesy, Nature Geosciences, 12, doi: 10.1038/s41561-  
721 018-0296-0, 2019.
- 722 Sutherland, L. C. and Bass, H. E.: Atmospheric absorption in the atmosphere up to 160 km, Journal of  
723 the Acoustical Society of America, 115, doi: 10.1121/1.1631937, 2004.
- 724 Tailpied, D., Le Pichon, A., Marchetti, E., Assink, J., and Vergnolle, S.: Assessing and optimizing the  
725 performance of infrasound networks to monitor volcanic eruptions, Geophysical  
726 Journal International, 208, doi: 10.1093/gji/ggw400, 2017.
- 727 [USGS: U.S. Geological Survey, Sulawesi 2018 earthquake event page, available at:](https://earthquake.usgs.gov/earthquakes/eventpage/us1000h3p4/)  
728 <https://earthquake.usgs.gov/earthquakes/eventpage/us1000h3p4/> (last accessed 02.09.2019), 2018.
- 729 [Walker, K. T., Le Pichon, A., Kim, T. S., de Groot-Hedlin, C., Che, I.-Y., and Garcés, M.: An analysis of](#)  
730 [ground shaking and transmission loss from infrasound generated by the 2011 Tohoku earthquake,](#)  
731 [Journal of Geophysical Research, 118, doi: 10.1002/2013JD020187, 2013.](#)
- 732 Wang, D. and Mori, J.: The 2010 Qinghai, China, Earthquake: A Moderate Earthquake with Supershear  
733 Rupture, Bulletin of the Seismological Society of America, 102, doi: 10.1785/0120110034, 2012.
- 734 Waxler, R., Assink, J., Hetzer, C., and Velea, D.: NCPAprop – A software package for infrasound  
735 propagation modeling, Journal of the Acoustical Society of America, 141, doi: 10.1121/1.4987797,  
736 2017.
- 737 Wilson, D. K.: The sound-speed gradient and refraction in the near-ground atmosphere, Journal of the  
738 Acoustical Society of America, 113, doi: 10.1121/1.1532028, 2003.
- 739 [Young, J. M. and Greene, G. E.: Anomalous infrasound generated by the Alaskan earthquake of 28](#)  
740 [march 1964, Journal of the Acoustical Society of America, 71, doi: 10.1121/1.387457, 1982.](#)
- 741 Yue, H., Lay, T., Freymueller, J. T., Ding, K., Rivera, L., Ruppert, N. A., and Koper, K. D.: Supershear  
742 rupture of the 5 January 2013 Craig, Alaska (Mw 7.5) earthquake, Journal of Geophysical Research, doi:  
743 10.1002/2013JB010594, 2013.

744

745 Supplementary Material

746

747 Figure S1

748

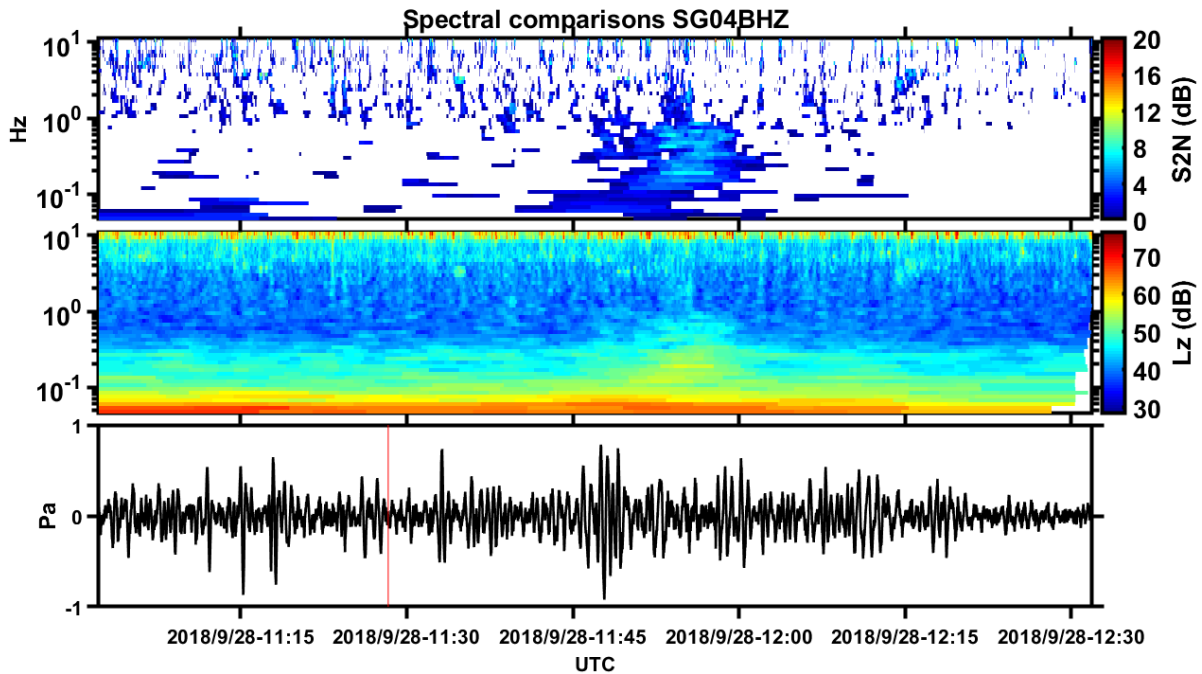

749

750 *Fig S1: Example of INFERNO analysis for the Singapore station (SING). The bottom panel is the*  
751 *waveform recorded at sensor SG04, with the red vertical line representing an estimated arrival time*  
752 *based on the location and time of the earthquake. The middle panel is an example of an INFERNO*  
753 *spectrogram where energy is calculated in fractional octave bands. The top panel is a signal to noise*  
754 *plot derived from the spectrogram. All the values for each frequency band are averaged and a 3dB*  
755 *threshold is set. Note that while the signal from the event is not as obvious within the waveform and*  
756 *spectrogram, the signal to noise plot clearly shows the signals arrival.*

757 **Figure S2**

758

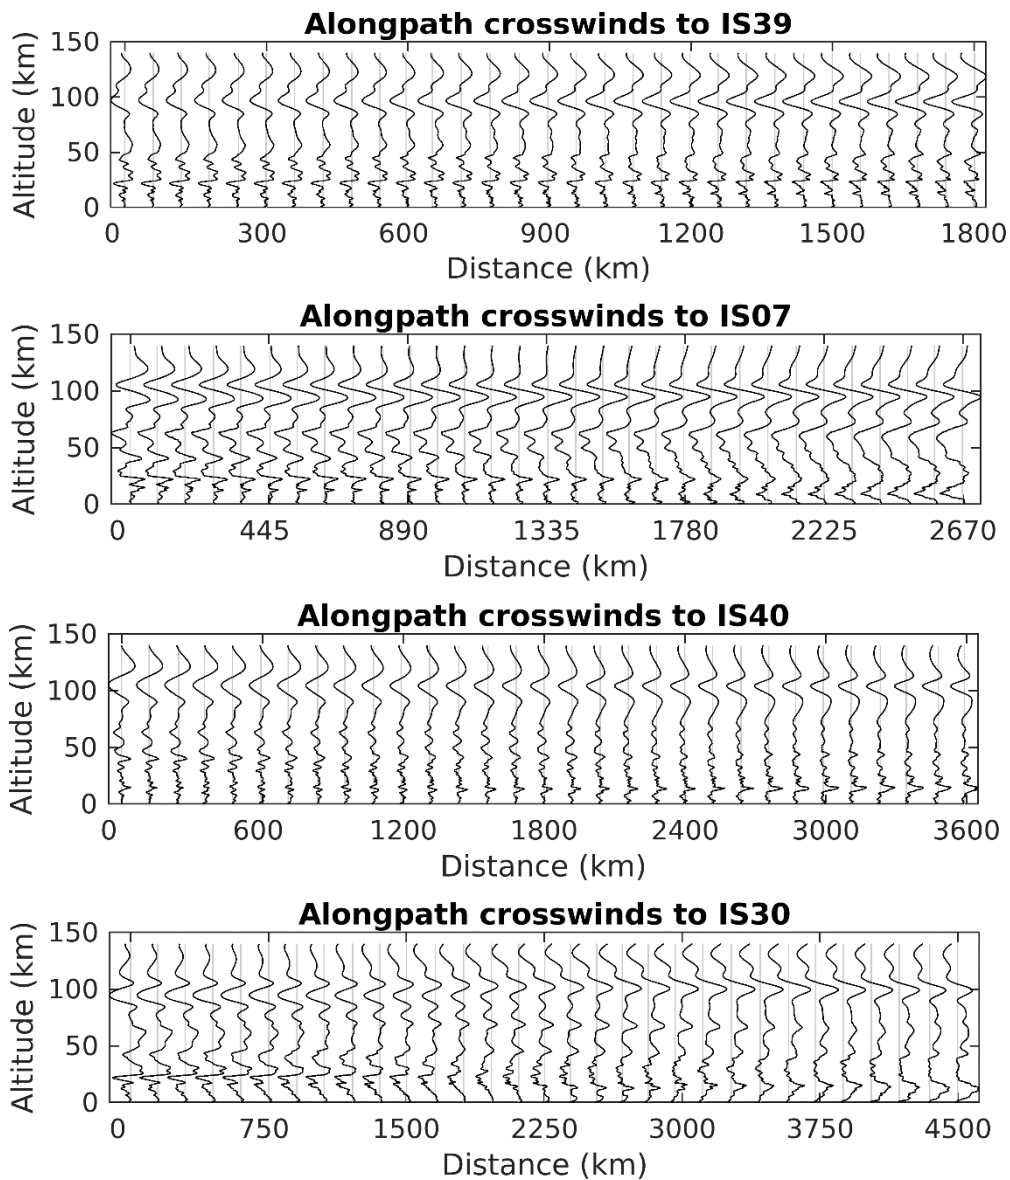

759

760 *Fig S2: Crosswind profiles along the propagation path from the epicenter to the four arrays. Positive*  
761 *values correspond to winds in the 90° clockwise perpendicular direction, the distance between two*  
762 *vertical lines corresponds to 50 m/s wind intensity. Range-dependent ECMWF profiles merged with*  
763 *climatologies are used as described in the data section. Enhanced positive crosswinds potentially*  
764 *responsible for positive back-azimuth deviations occur at I39PW around the stratospheric turning*  
765 *altitude of 50 km and to some degree below that altitude. Strong negative crosswinds at 50 km altitude*  
766 *and below occur at I07AU and might explain negative back-azimuth deviations for this station. Weak*  
767 *total crosswinds at and below 50 km at station I40PG might explain marginal back-azimuth deviations*  
768 *at this station. Strong thermospheric crosswinds around 100 km and below might explain back-azimuth*  
769 *deviations at I30JP after thermospheric propagation.*

770 **Figure S3**

771

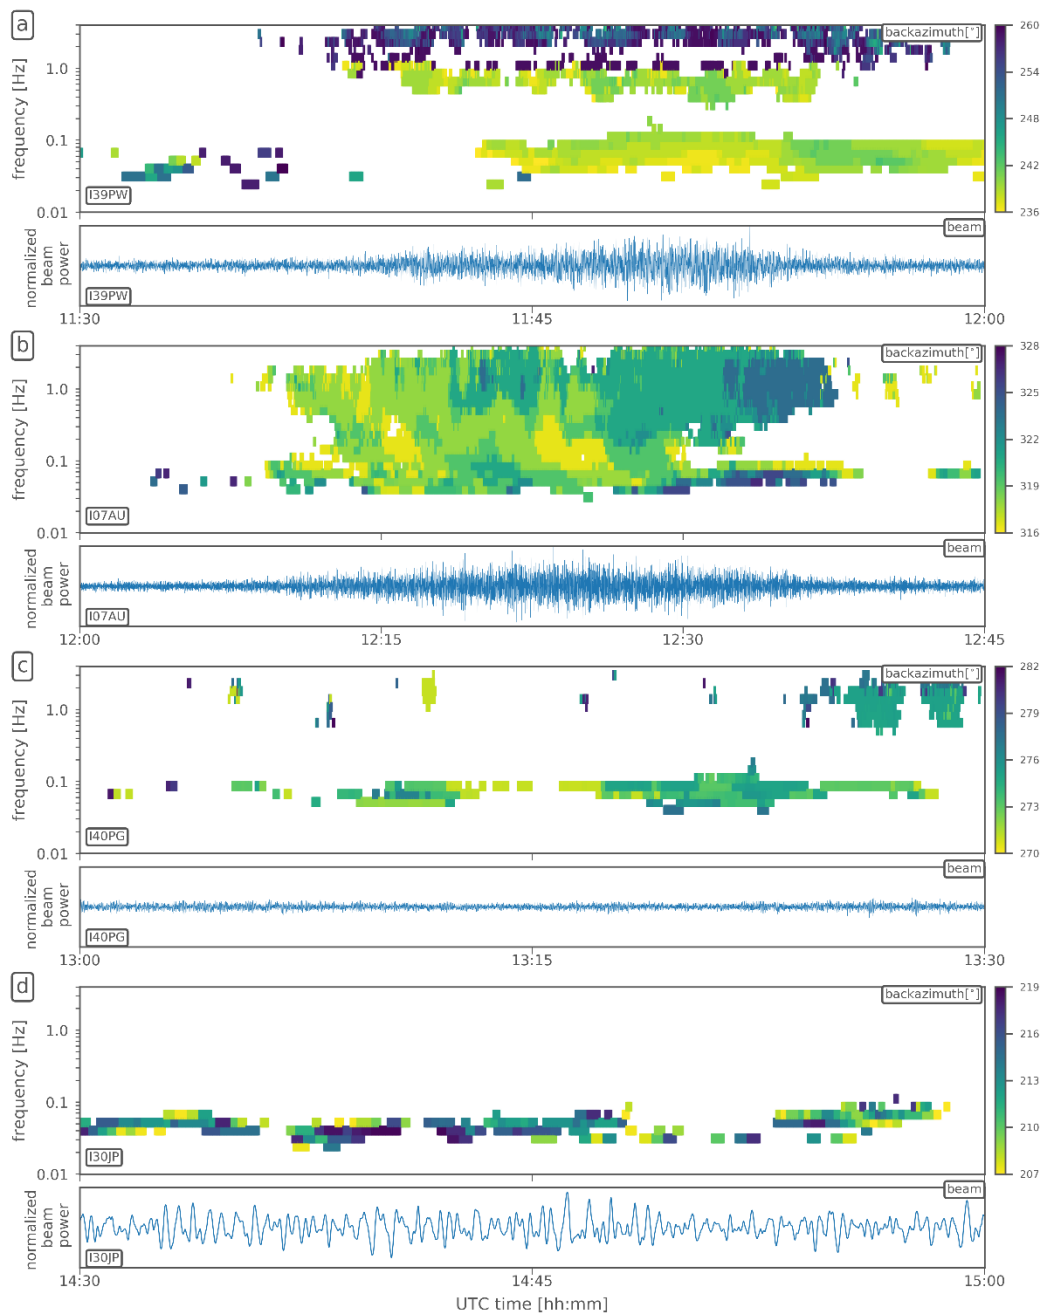

772

773 *Fig S3: Waveform beams and PMCC backazimuth information for the four infrasound arrays of figure*  
774 *2. Absolute backazimuth directions are provided here instead of epicentral deviations, allowing to*  
775 *quantify changes and differences in the direction of signal origin. A small azimuthal section ( $\pm 12^\circ$  from*  
776 *the expected epicenter direction in subfigure a,  $\pm 6^\circ$  in subfigure b, c and d) and short time window (30*  
777 *min in subfigures a, c and d, 45 min in subfigure b) is chosen to highlight the epicentral infrasound's*  
778 *origin direction and arrival time as specified in table 1. Differences in the direction of origin between*  
779 *the high-frequency and the mid- to low-frequency parts of the epicentral infrasound are found at I39PW*  
780 *(subfigure a) in the order of  $\pm 10^\circ$ . An azimuthal sweep of about  $7^\circ$  is observed at I07AU (subfigure b).*  
781 *Both phenomena indicate a spatially and temporally extended source. Only small and mostly arbitrary*  
782 *backazimuth variation is present at stations I40PG and I30JP (subfigures c and d).*

783

**Figure S4**

784

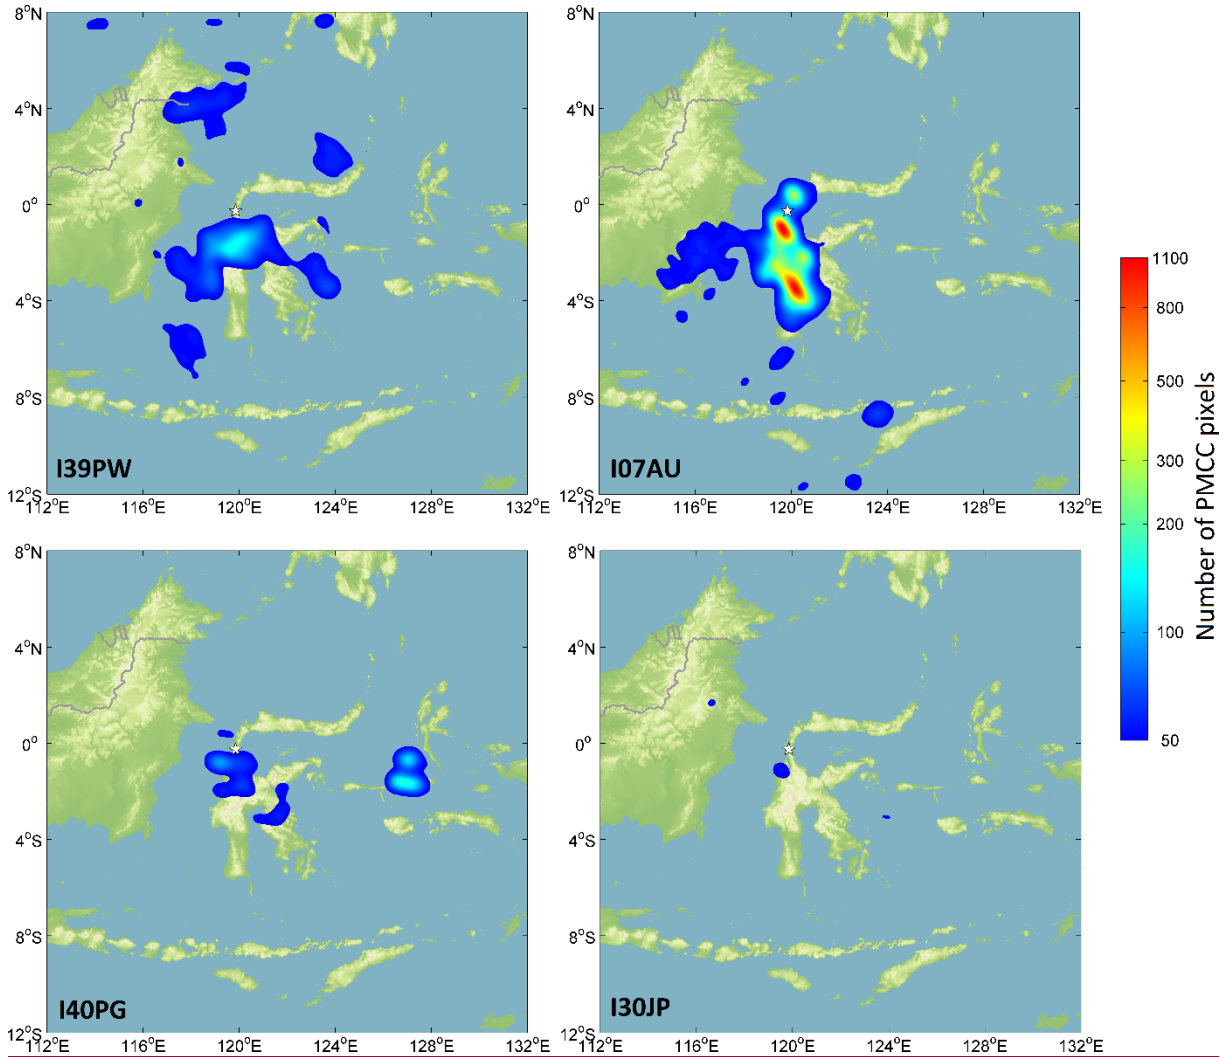

785

786

787

788

789

790

791

792

793

*Fig S4: Single-station back projection maps for the four infrasound arrays. The colorbar of each figure starts at a 4 time lower value than in the cumulative 4-station-figure 5. The main region near the epicenter (marked by a star) and the rupture south of it are projected reasonably well for each station. The directional deviation and spatial extension of the back-projected source regions per station corresponds to backazimuth variations as e.g. the azimuthal sweep in figure S3. Additionally, regions of potential seismoacoustic signal generation are identified around the island of Sulawesi, as described in the manuscript text.*
